1 **NEUROGENIC DECISIONS REQUIRE A CELL CYCLE INDEPENDENT**  
2 **FUNCTION OF THE CDC25B PHOSPHATASE**

3

4 Frédéric BONNET<sup>1</sup>, Mélanie ROUSSAT<sup>1</sup>, Angie MOLINA<sup>1</sup>, Manon AZAIS<sup>2</sup>, Sophie BEL-  
5 VIALAR<sup>1</sup>, Jacques GAUTRAIS<sup>2</sup>, Fabienne PITUELLO<sup>1,\*</sup> and Eric AGIUS<sup>1,\*</sup>

6

7 "Frederic Bonnet" [bonnet@mpi-cbg.de](mailto:bonnet@mpi-cbg.de)

8 "Mélanie roussat" [melanie.roussat@univ-tlse3.fr](mailto:melanie.roussat@univ-tlse3.fr)

9 "Angie Molina" [angie-patricia.molina-delgado@univ-tlse3.fr](mailto:angie-patricia.molina-delgado@univ-tlse3.fr)

10 "Manon Azais" [manon.azais@univ-tlse3.fr](mailto:manon.azais@univ-tlse3.fr)

11 "Sophie vialar" [sophie.vialar@univ-tlse3.fr](mailto:sophie.vialar@univ-tlse3.fr)

12 "Jacques Gautrais" [jacques.gautrais@univ-tlse3.fr](mailto:jacques.gautrais@univ-tlse3.fr)

13 "Fabienne Pituello" [fabienne.pituello@univ-tlse3.fr](mailto:fabienne.pituello@univ-tlse3.fr)

14 "Eric Agius" [eric.agius@univ-tlse3.fr](mailto:eric.agius@univ-tlse3.fr)

15

16 1 Centre de Biologie du Développement (CBD), Centre de Biologie Intégrative (CBI),  
17 Université de Toulouse, CNRS, UPS, France.

18 2 Centre de Recherches sur la Cognition Animale (CRCA), Centre de Biologie Intégrative  
19 (CBI), Université de Toulouse, CNRS, UPS, France.

20 \*Co-corresponding authors

21

22

23 **Abbreviated title:** CDC25B and neurogenesis

24

25 **Corresponding authors:** Eric AGIUS, Fabienne PITUELLO, Centre de Biologie du  
26 Développement, Centre de Biologie Intégrative, Université de Toulouse, CNRS-UPS  
27 (UMR5547) ; 118 route de Narbonne, F-31062 Toulouse, France

28 E-mail adresses: [fabienne.pituello@univ-tlse3.fr](mailto:fabienne.pituello@univ-tlse3.fr), [eric.agius@univ-tlse3.fr](mailto:eric.agius@univ-tlse3.fr)

29 Fax: (33)5 61 55 65 07, Phone: (33)5 61 55 67 39

30

31

32 **Keywords:** neural stem cells, neurogenesis, proliferation, differentiation, cell cycle,  
33 neurogenic division, CDC25 phosphatases, neural tube, vertebrate embryo

34 **ABSTRACT**

35 A fundamental issue in developmental biology and in organ homeostasis is  
36 understanding the molecular mechanisms governing the balance between stem cell  
37 maintenance and differentiation into a specific lineage. Accumulating data suggest that cell  
38 cycle dynamics plays a major role in the regulation of this balance. Here we show that the  
39 G2/M cell cycle regulator CDC25B phosphatase is required in mammals to finely tune  
40 neuronal production in the neural tube. We show that in chick neural progenitors, CDC25B  
41 activity is both required and sufficient to stimulate neurogenic divisions and to promote  
42 neuronal differentiation. We design a mathematical model showing that within a limited  
43 period of time, cell cycle length modifications cannot account for changes in the ratio of the  
44 mode of division. Using a CDC25B point mutation that cannot interact with CDK, we show  
45 that part of CDC25B activity on neurogenic divisions is independent of its action on the cell  
46 cycle.

## 47 INTRODUCTION

48

49 In multicellular organisms, managing the development, homeostasis and  
50 regeneration of tissues requires the tight control of self-renewal and differentiation of  
51 stem/progenitor cells. This issue is particularly evident in the nervous system, where  
52 generating the appropriate number of distinct classes of neurons is essential to  
53 constructing functional neuronal circuits.

54 Steadily increasing data reveal links between the cell cycle and stem cells' choice  
55 to proliferate or differentiate (Soufi & Dalton, 2016). The G1 phase is usually associated  
56 with the initiation of differentiation. Notably, the length of the G1 phase has been shown to  
57 play a major role in controlling cell fate decisions in neurogenesis, haematopoiesis (Lange  
58 & Calegari, 2010) and mammalian embryonic stem cells (Coronado et al., 2013; Sela,  
59 Molotski, Golan, Itskovitz-Eldor, & Soen, 2012), including human embryonic stem cells  
60 (hESCs) (Pauklin & Vallier, 2013; Sela et al., 2012). During cortical neurogenesis, a  
61 lengthening of the G1 phase is associated with the transition from neural-stem-like apical  
62 progenitors (AP) to fate restricted basal progenitors (BP) (Arai et al., 2011). Reducing G1  
63 phase length leads to an increased progenitor pool and inhibition of neuronal  
64 differentiation, while lengthening the G1 phase promotes the opposite effects (Calegari,  
65 Haubensak, Haffner, & Huttner, 2005; Pilaz et al., 2009). In the developing spinal cord, G1  
66 phase duration increases with neurogenesis (Kicheva et al., 2014; Saade et al., 2013).  
67 Interestingly, in hESCs and in neurogenesis it has been shown that the stem/progenitor  
68 cell uses Cyclin D, which controls G1 phase progression, to directly regulate the signaling  
69 pathways and the transcriptional program controlling cell fate choice (Bienvenu et al., 2010;  
70 Lukaszewicz & Anderson, 2011; Pauklin, Madrigal, Bertero, & Vallier, 2016; Pauklin &  
71 Vallier, 2013). A transient increase of epigenetic modifiers at developmental genes during  
72 G1 has also been reported to create "a window of opportunity" for cell fate decision in  
73 hESCs (Singh et al., 2015).

74 Modification of other cell cycle phases has been correlated with the choice to  
75 proliferate or differentiate. Work on hESCs reveals that cell cycle genes involved in DNA  
76 replication and G2 phase progression maintain embryonic stem cell identity (Gonzales et  
77 al., 2015), leading the authors to propose that S and G2/M mechanisms control the  
78 inhibition of pluripotency upon differentiation. In the amphibian or fish retina, the conversion  
79 of slowly dividing stem cells into fast-cycling transient amplifying progenitors with shorter  
80 G1 and G2 phases, propels them to exit the cell cycle and differentiate (Agathocleous,  
81 Locker, Harris, & Perron, 2007; Locker et al., 2006). A shortening of the S phase correlates

82 with the transition from proliferative to differentiating (neurogenic) divisions in mouse  
83 cortical progenitors (Arai et al., 2011). In the developing spinal cord, shorter S and G2  
84 phases are associated with the neurogenic phase (Cayuso & Marti, 2005; Kicheva et al.,  
85 2014; Le Dreau, Saade, Gutierrez-Vallejo, & Marti, 2014; Molina & Pituello, 2016; Peco et  
86 al., 2012; Saade, Gonzalez-Gobartt, Escalona, Usieto, & Martí, 2017; Saade et al., 2013;  
87 Wilcock, Swedlow, & Storey, 2007). Until now these links between cell cycle kinetics and  
88 cell fate were most often correlations, with the direct impact of cell cycle modifications on  
89 cell fate choice being only indirectly addressed. The strong correlations between the cell  
90 cycle machinery and the stem cell's choice in different model systems, emphasize the  
91 importance of elucidating how these systems work.

92 A link has previously been established between a regulator of the G2/M transition,  
93 the CDC25B phosphatase and neurogenesis (Gruber et al., 2011; Peco et al., 2012; Ueno,  
94 Nakajo, Watanabe, Isoda, & Sagata, 2008). The cell division cycle 25 family (CDC25) is a  
95 family of dual specificity phosphatases that catalyze the dephosphorylation of the cyclin-  
96 dependent kinases (CDKs), leading to their activation and thereby cell cycle progression  
97 (Aressy & Ducommun, 2008). Three CDC25s A, B, C have been characterized in  
98 mammals, and two, CDC25s A and B have been found in chick (Agius, Bel-Vialar, Bonnet,  
99 & Pituello, 2015; Boutros, Lobjois, & Ducommun, 2007). As observed for numerous cell  
100 cycle regulators, these molecules are tightly regulated at the transcriptional and post-  
101 transcriptional levels (Boutros et al., 2007). The N-terminal region of CDC25B contains the  
102 regulatory domain, and the C-terminal region hosts the catalytic domain and the domain of  
103 interaction with known substrates, the CDKs (Sohn et al., 2004). In *Xenopus*, CDC25B  
104 loss-of-function reduces the expression of neuronal differentiation markers (Ueno et al.,  
105 2008). An upregulation of CDC25B activity associated with precocious neurogenesis has  
106 been observed in an animal model of microcephaly (Gruber et al., 2011). Using the  
107 developing spinal cord as a paradigm, we previously reported that CDC25B expression  
108 correlates remarkably well with areas where neurogenesis occurs (Agius et al., 2015; Peco  
109 et al., 2012). We showed that reducing CDC25B expression in the chicken neural tube  
110 alters both cell cycle kinetics, by increasing G2-phase length, and neuron production  
111 (Agius et al., 2015; Peco et al., 2012). However, it is not clear whether the change in cell  
112 cycle kinetics is instrumental in cell fate change.

113  
114 The aim of the present study is to further understand the mechanisms by which  
115 CDC25B promotes neurogenesis. First, we use a neural specific loss-of-function in mice  
116 to show that neurogenic activity of Cdc25B is conserved in mammals. Second, we use

117 gain- and loss-of-function in chicken to show that CDC25B is necessary and sufficient to  
118 promote neuron production by controlling the mode of division. We directly measured  
119 CDC25B effect upon modes of division using recently developed biomarkers that allow to  
120 differentiate with single-cell resolution the three modes of division taking place in the  
121 developing spinal cord: proliferative where a progenitor gives rise to two progenitors (PP);  
122 asymmetric neurogenic where a progenitor gives rise to one progenitor and one neuron  
123 (PN), and terminal symmetric neurogenic where the progenitor gives rise to two neurons  
124 (NN) (Saade et al., 2013). These biomarkers were previously used to analyze the role of  
125 signaling pathways controlling the progenitor's mode of division (Le Dreau et al., 2014;  
126 Saade et al., 2017; Saade et al., 2013). CDC25B modulation of the mode of division  
127 appeared dependent on the context: in domains where cells perform mainly proliferative  
128 divisions, CDC25B gain of function promotes asymmetric neurogenic divisions, and in  
129 domains where cells accomplish mostly asymmetric neurogenic divisions, it promotes  
130 terminal symmetric neurogenic division. A mathematical model of these dynamics  
131 suggests that the cell cycle duration is not instrumental in the observed evolution of the  
132 mode of division.

133 Furthermore, to directly address the putative role of the cell cycle kinetics on the  
134 mode of division, we use a point mutated form of CDC25B, CDC25B<sup>ΔCDK</sup> unable to interact  
135 with CyclinB/CDK1 complex. We show that this molecule stimulates asymmetric  
136 neurogenic divisions and neuronal differentiation even though it does not affect the  
137 duration of the G2 phase.

138

## 139 RESULTS

140

### 141 Genetic *Cdc25B* invalidation induces a G2-phase lengthening and impedes neuron 142 production in the mouse developing spinal cord

143 We previously showed that downregulating CDC25B levels using RNAi in the  
144 chicken neural tube results in a G2 phase lengthening and a reduction of the number of  
145 neurons. Here we used a genetic approach to question whether both functions are  
146 conserved in mammals, using a floxed allele of *Cdc25B* and a *NestinCre; Cdc25B<sup>+/-</sup>* mouse  
147 line to specifically ablate the phosphatase in the developing nervous system (Figure 1A).  
148 In the mouse embryo, *Cdc25B* is detected in the neural tube from E8.5 onward and remains  
149 strongly expressed in areas where neurogenesis occurs, as illustrated in the E11.5 neural  
150 tube (Figure 1B). Loss of *Cdc25B* mRNA was observed from E10.5 onward in *NestinCre;*  
151 *Cdc25B<sup>fl/-</sup>* embryos (*Cdc25B<sup>nesKO</sup>*, Figure 1B). We therefore determined the consequences  
152 of the Cre-mediated deletion of the floxed *Cdc25B* allele on cell cycle parameters and  
153 neurogenesis starting at E11.5.

154 The proliferation capacity of the neural progenitors in *NestinCre; Cdc25B<sup>fl/-</sup>*  
155 embryos, was determined by quantification of EdU labelled replicating neural progenitors.  
156 The proliferative index in the dorsal spinal cord (number of EdU+ cells among total number  
157 of neural progenitors labelled with Pax7 antibody) was similar between *NestinCre;*  
158 *Cdc25B<sup>fl/-</sup>* and control embryos (*NestinCre; Cdc25B<sup>fl/+</sup>* or *Cdc25B<sup>fl/+</sup>* or *Cdc25B<sup>fl/-</sup>*) (Figure  
159 1C). Similarly, the fraction of mitotic cells assessed by quantifying the number of Phospho-  
160 Histone 3 (PH3) mitotic cells in the Pax7+ cells displayed a slight and non-significant  
161 reduction in the mitotic index of mutant embryos (Figure 1D). Since downregulating  
162 *CDC25B* in the chicken neural tube resulted in a lengthening of the G2 phase, we next  
163 compared the length of the G2 phase in the dorsal spinal cord of *NestinCre;Cdc25B<sup>fl/-</sup>*  
164 versus control embryos using the percentage of labeled mitosis (PLM) (Quastler &  
165 Sherman, 1959). Embryos were injected with EdU and allowed to recover for 1 hour, 2  
166 hours or 3 hours before fixation and staining with EdU and PH3 antibodies. We found that  
167 the percentage of PH3/EdU positive cells is consistently lower in the dorsal domain of  
168 *NestinCre; Cdc25B<sup>fl/-</sup>* versus control embryos (Figure 1E). The average G2-lengths  
169 extracted from the curve are 2 hours 19 minutes in mutants compared to 1 hour 49 minutes  
170 in controls (Figure 1E). This indicates that *Cdc25B* loss-of-function in dorsal neural  
171 progenitors results in a G2 phase lengthening.

172 The question is then whether *Cdc25B* loss-of-function affects spinal neurogenesis.  
173 Neuron production occurs in two phases in the dorsal spinal cord, an early neurogenic



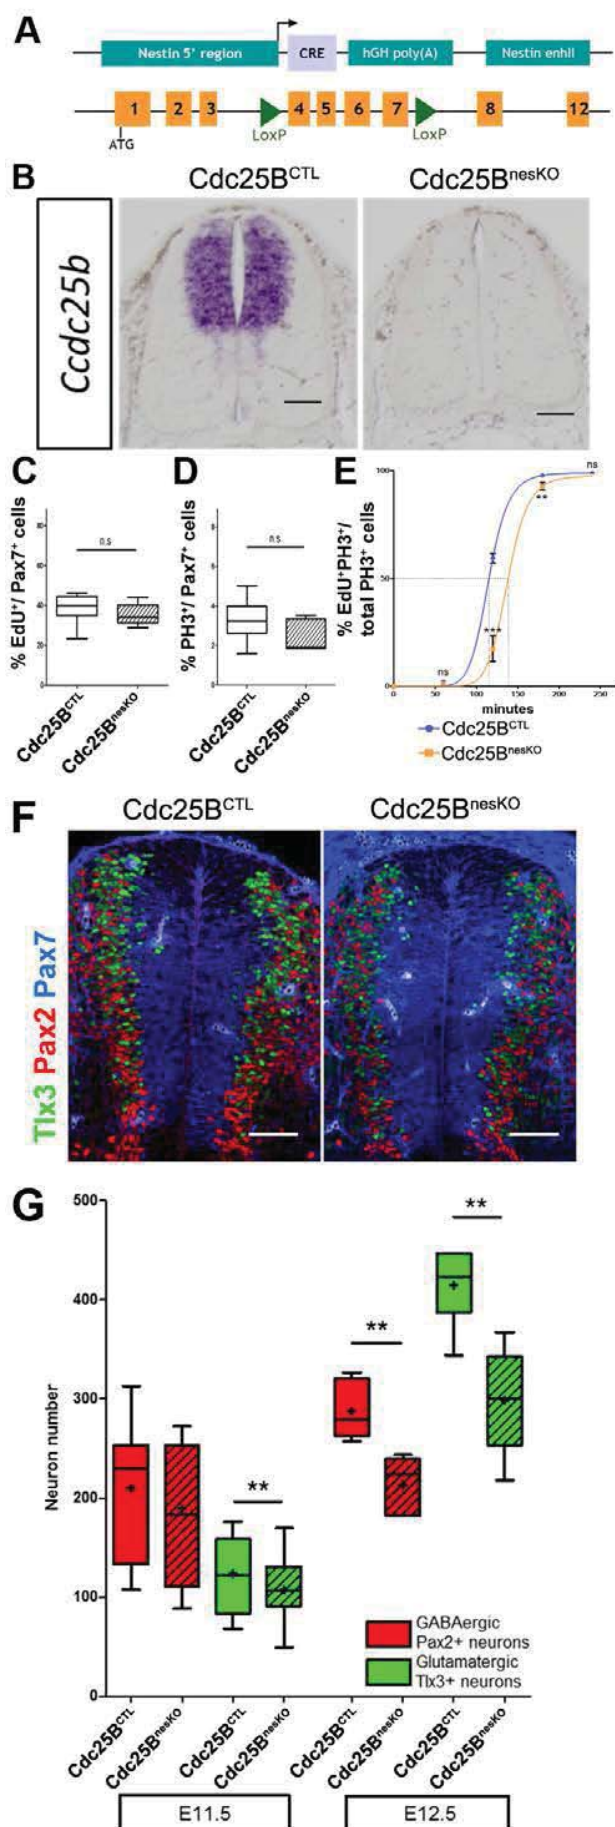

**Figure 1. *Cdc25B* conditional genetic loss-of-function increases the G2-phase length and impairs dorsal spinal neurogenesis.** **A:** Scheme of the genetic construction for *Cdc25B* conditional loss-of-function. **B:** *Cdc25B* *in situ* hybridization at E11.5 in control (CTL) and nesKO conditions. **C:** Box and whisker plots (5/95 percentile) comparing the proliferative index: distribution of the percentage of EdU+ / Pax7+ cells indicative of the proliferative index at E11.5 in control and conditional KO neural tubes. **D:** Box and whisker plots (5/95 percentile) comparing the distribution of the percentage of PH3+ / Pax7+ cells indicative of the mitotic index at E11.5 in control and conditional KO neural tubes. The proliferative index was analyzed using 20 controls and 7 nesKO embryos. **E:** Progression of the number of EdU/PH3 co-labeled nuclei with increasing EdU exposure time in control and nesKO conditions. The dashed lines correspond to 50% EdU+/PH3+ cells and indicate the G2 length. **F:** Cross-sections of E12.5 embryo neural tubes, stained with Pax7, Pax2 and Tlx3 in CTL and nesKO conditions. **G:** Box and whisker plots (5/95 percentile) comparing the distribution of the number of Pax2 and Tlx3 neurons in control and nesKO conditions at E11.5 and E12.5. The number of analyzed embryos was 15 control vs 11 nesKO for Pax2 and 15 control vs 10 nesKO for Tlx3. The cross indicates the mean value. Mixed model, \*\* $p < 0.01$ . Scale bar represent 100  $\mu$ m.

174 phase (between E9.5 and E11.5) and a late neurogenic phase (between E11.5 and E13.5)  
175 (Hernandez-Miranda, Müller, & Birchmeier, 2016). Neurons emerging from the dorsal  
176 spinal cord express numerous transcription factors including Pax2 and Tlx3 that label  
177 distinct neuron types and when combined, identify different subtypes of early (Pax2: dl4,  
178 dl6; Tlx3: dl3, dl5) and late born neurons (Pax2: dlLA; Tlx3: dlLB). The use of a *NestinCre*  
179 mouse line allows us to acutely ablate the phosphatase at the time of late neuron  
180 production (Hernandez-Miranda et al., 2016). We hence analyze the impact of the deletion  
181 at E11.5 and E12.5. At E11.5, the number of Tlx3<sup>+</sup> cells is reduced in the  
182 *NestinCre;Cdc25B<sup>fl/-</sup>* compared to control embryos. Pax2<sup>+</sup> neurons are also reduced yet  
183 non-significantly (Figure 1F, G). One day later, a clear and significant reduction of 25.7%  
184 and 28% in the number of Pax2<sup>+</sup> and Tlx3<sup>+</sup> neurons, respectively, is observed following  
185 *Cdc25B* deletion. The size of the progenitor domain measured using Pax7  
186 immunohistochemistry shows a slight but non-significant increase (Figure supplement 1),  
187 indicating that neuron reduction is not due to a reduction of the progenitor population.  
188 Quantification of active caspase 3 immunostaining (E12.5) does not reveal an increase in  
189 cell death, showing that the reduction in neuron number is not due to apoptosis (not  
190 shown). The ratio of dlLA to dlLB neurons is similar between control (0.68) and mutant  
191 embryos (0.71), confirming that *Cdc25B* does not impact specific neuronal cell type but  
192 rather has a generic effect on neuron production. Together, these observations  
193 demonstrate that efficient spinal neuron production requires *Cdc25B* in mammalian  
194 embryos, illustrating that this function is conserved among higher vertebrates.

195

### 196 **CDC25B gain-of-function increases neuronal production**

197 The fact that CDC25B downregulation impedes neuron production in mouse and  
198 chicken embryos, prompted us to test whether CDC25B gain-of-function is sufficient to  
199 stimulate neurogenesis. It is not possible to perform CDC25B gain-of-function using a  
200 robust ubiquitous promoter, because an unscheduled increase of the phosphatase during  
201 the cell cycle leads to mitotic catastrophe and subsequent apoptosis (Peco et al., 2012).  
202 To circumvent this technical impasse, we express CDC25B using the mouse cell cycle  
203 dependent CDC25B cis regulatory element (ccRE) that reproduces the cell cycle regulated  
204 transcription of CDC25B (Korner, Jerome, Schmidt, & Muller, 2001) and prevents  
205 apoptosis (Kieffer, Lorenzo, Dozier, Schmitt, & Ducommun, 2007). We verify that ccRE is  
206 sufficient to drive lacZ reporter expression in the entire chicken neural tube after  
207 transfection by *in ovo* electroporation (Figure Supplement 2A). Under the control of ccRE,  
208 the eGFP-CDC25B fusion protein is expressed in a subset of transfected cells (Figure 2A).



Bonnet et al. Figure 2

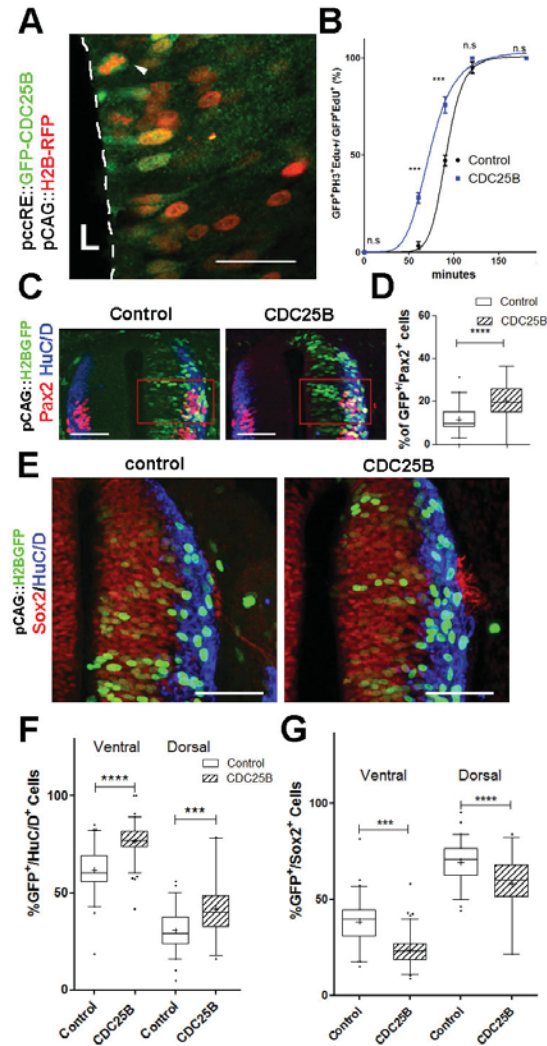

**Figure 2: CDC25B speeds up neuronal production.** **A:** Cross section of E2.5 chick spinal cord 24 hours after electroporation of pCAG::H2B-RFP vector and pccRE::GFP-CDC25B vector, followed by an anti-GFP immunolocalisation. Note that the protein is expressed in the dorsal neuroepithelium in cells exhibiting a nucleus close to the lumen side (L) or undergoing mitosis (arrowhead). Scale bar indicates 50  $\mu$ m. **B:** Curves representing the progression of EdU/PH3 co-labeled nuclei with increasing EdU exposure times: control (black), CDC25B (blue). Note that the curve corresponding to the CDC25B condition (blue) is shifted to the left, showing a reduction in G2 phase length. **C:** Representative sections of E3.5 chick spinal cord 48 hours after co-electroporation of a pCAG::H2B-GFP with either a pccRE::control or a pccRE::CDC25B expression vector and processed for Pax2 (red) and HuC/D (blue) immunostaining. The red box illustrates the quantified domain. Scale bars indicate 100  $\mu$ m. **D:** Box and whisker plots (5/95 percentile) comparing the percentage of Pax2<sup>+</sup> cells within the electroporated population in the control and CDC25B gain-of-function experiments in the dorsal neural tube. Data from 3 different experiments with 8 embryos for the control conditions, and 5 embryos for the CDC25B gain-of-function. **E:** Representative sections of E3.5 chick spinal cord 48 hours after co-electroporation of pCAG::H2B-GFP with either a control or a CDC25B expression vector and processed for Sox2 immunostaining (red) and HuC/D (blue). Scale bars indicate 100 $\mu$ m. **F:** Box and whisker plots (5/95 percentile) comparing the percentage of electroporated HuC/D<sup>+</sup> cells in the ventral and dorsal neural tube. Data represent 3 different experiments with 13 and 6 embryos in dorsal and ventral respectively under control conditions and 6 and 7 embryos in dorsal and ventral respectively for CDC25B gain-of-function. The cross represents the mean value. **G:** Box and whisker plots (5/95 percentile) comparing the percentage of Sox2<sup>+</sup> cells within the electroporated population in the control, CDC25B gain-of-function experiments in the dorsal or ventral neural tube. Same conditions as in F.

209 The level of chimeric protein detected results from the periodic expression induced by the  
210 promoter and the intrinsic instability of CDC25B actively degraded at the end of mitosis.  
211 The fusion protein can be observed both in the nucleus and cytoplasm of neuroepithelial  
212 progenitors located close to the lumen (L) and in mitotic progenitors (Figure 2A arrowhead).  
213 The gain-of-function does not induce apoptosis, as revealed by quantification of active  
214 caspase 3 immunostaining (Figure Supplement 2B-D). To ascertain that the phosphatase  
215 is functional, we analyze its impact on G2 phase duration. As expected, ectopic expression  
216 of the phosphatase shortens the G2 phase (Figure 2B, blue curve) without significantly  
217 modifying the mitotic index or the proliferation index (Figure Supplement 2E-F). We  
218 analyze the neurogenic effects of CDC25B gain-of-function 48 hours after electroporation  
219 by measuring the expression of the luciferase reporter under the NeuroD promoter (Figure  
220 Supplement 3), by analyzing an interneuron marker Pax2 (Figure 2C, D) and by using a  
221 pan neuronal marker HuC/D (Figure 2F, G) in conjunction with a pan progenitor marker  
222 Sox2 (Figure 2E).

223 A quantitative analysis performed on the entire neural tube using NeuroD- reporter  
224 assay indicates that increasing CDC25B is sufficient to promote neuronal commitment  
225 (Figure Supplement 3). In the neural tube, development of the ventral progenitor population  
226 is usually considered more advanced than its dorsal counterpart (Kicheva et al., 2014;  
227 Saade et al., 2013). Accordingly, the temporality of neuron production progresses from  
228 ventral to dorsal (Kicheva et al., 2014; Saade et al., 2013) and correlated with endogenous  
229 CDC25B expression (Peco et al., 2012). We therefore analyze separately the fraction of  
230 neurons generated following CDC25B gain-of-function in the ventral and dorsal halves of  
231 this structure. In the ventral neural tube, CDC25B gain-of-function increases the  
232 percentage of HuC/D<sup>+</sup> GFP<sup>+</sup> cells from 61.6 +/- 1.5% to 76.5 +/-0.9 %. Similarly, in the  
233 dorsal spinal cord, the proportion increases from 30.66+/- 1.34% to 41.80+/-2.64% with the  
234 CDC25B gain-of-function (Figure 2F, G). A significant increase in neurogenesis is also  
235 observed using Pax2 immunostaining from 11.4 +/- 1 % to 20 +/-1.8 % (Figure 2C, D).  
236 Conversely, CDC25B gain-of-function reduces the proportion of cells expressing the  
237 progenitor marker Sox2 (Figure 2E). Together, these results indicate that CDC25B is  
238 sufficient to stimulate neuron production.

239

#### 240 **CDC25B has no effects on mitotic spindle parameters**

241 An increase in CDC25B activity has been shown to induce a shifted cleavage plane  
242 and precocious neurogenesis during corticogenesis in mouse (Gruber et al., 2011). We  
243 therefore tested the effect of CDC25B gain-of-function on spindle orientation in spinal

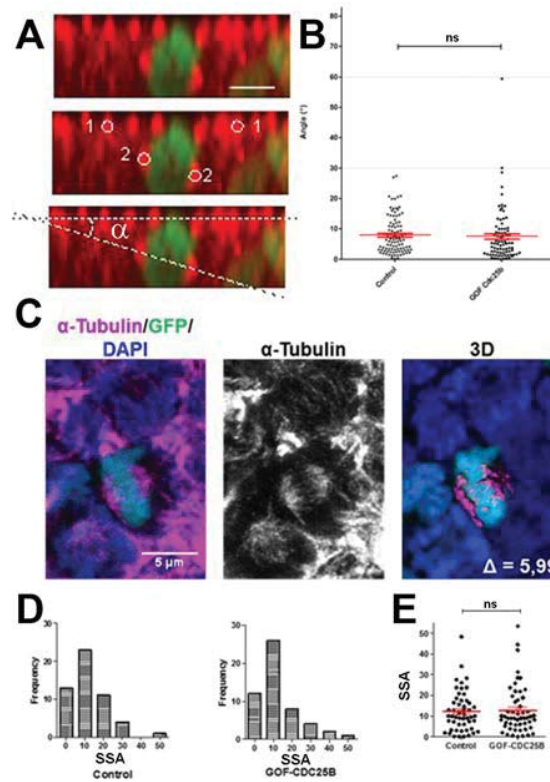

**Figure 3. CDC25B gain-of-function does not affect mitotic spindle orientation or spindle-size asymmetry (SSA).** **A:** Representative Z plane image of an anaphase cell expressing H2B-GFP that decorates chromosomes (green) and immunostained with  $\gamma$  tubulin to label centrosomes (red). Aligned interphase centrosomes labelled as 1 and mitotic spindle poles labelled as 2 (middle image) were used to measure mitotic spindle angle  $\alpha$  (lower image). Scales bar represent 5  $\mu$ m. **B:** Quantification of mitotic spindle angle  $\alpha$ , 24 hours after electroporation in control and CDC25B gain-of-function experiments. **C:** Representative image of a symmetric metaphase cell: H2B-GFP and DAPI stain the nuclei and  $\alpha$ -tubulin stains the mitotic spindle (left and middle images). Right image, 3D reconstruction of the symmetric spindle using Imaris which measures the spindle-size delta. **D, E:** Distribution of the Spindle Size Asymmetry (SSA) size difference between the two sides of the spindle 24 hours after electroporation: Box plot of the SSA distribution (**D**) and scatter plot of SSA distribution (**E**).

244 neural precursors. We measured the angle of mitotic spindle as previously described  
245 (Saadaoui et al., 2014). We did not observe a significant change in the spindle orientation  
246 (Figure 3A, B). Another element implicated in asymmetric cell fate in neural progenitors is  
247 the spindle size asymmetry (SSA), i.e., the difference in size between the two sides of the  
248 spindle (Delaunay, Cortay, Patti, Knoblauch, & Dehay, 2014). Our CDC25B gain-of-  
249 function experiments did not induce a significant modification of the SSA of chick spinal  
250 neural progenitors (Figure 3C-D). In summary, our analyses did not reveal an effect of  
251 CDC25B activity on the orientation or the size of the mitotic spindle.

252

### 253 ***CDC25B downregulation maintains proliferative divisions at the expense of both*** 254 ***asymmetric and symmetric neurogenic divisions***

255 To elucidate CDC25B function, we investigate whether it might promote  
256 neurogenesis by controlling the division mode of neural progenitors. We take advantage  
257 of a strategy recently developed by E. Marti and colleagues (Le Dreau et al., 2014; Saade  
258 et al., 2017; Saade et al., 2013), which allows us to unequivocally identify and distinguish  
259 the three modes of division, PP, PN and NN, occurring in the chicken developing spinal  
260 cord. Briefly, neural tube is electroporated with the Sox2::GFP and Tis21::RFP reporters,  
261 and 24 hours later the number of neural progenitors expressing each of these markers is  
262 quantified at mitosis. Thus, cells performing PP divisions express only Sox2::GFP and  
263 appear in green, those performing NN divisions express only Tis21::RFP and appear in  
264 red, while asymmetric neurogenic divisions, PN, which co-express both biosensors, appear  
265 in yellow (Figure 4A). Using these biomarkers in the dorsal neural tube, we obtained a  
266 number of PP, PN and NN divisions comparable to the ones previously described (Figure  
267 2B) (Le Dreau et al., 2014). Because the number of electroporated cells in mitosis is very  
268 small, we determine whether counting neural progenitors displaying green, yellow or red  
269 fluorescence is equivalent to counting only mitotic cells in the dorsal spinal cord 24 hours  
270 post electroporation. We do not detect a significant difference in the % of green (GFP+),  
271 yellow (GFP+/RFP+) and red (RFP+) cells in total neuroepithelial progenitors (55.4 +/-  
272 6.2% green cells, 29.3 +/- 3.9% yellow cells and 15.2 +/- 2.9% red cells) and during mitosis  
273 (57.9 +/- 9.3% green cells, 23.2 +/- 8.5% yellow cells and 19 +/- 7.3% red cells) (Figure  
274 4B). We therefore use the percentage of labeled progeny to estimate the percentage of  
275 proliferative (PP), asymmetric neurogenic (PN) and terminal neurogenic (NN) divisions.  
276 Because of reporter stability, the temporal window of analysis of Marti's biosensors is  
277 restricted to 24 hours (Saade et al., 2013). CDC25B RNAi electroporation leads to a  
278 consistent and strong downregulation in *CDC25B* transcripts located in the intermediate

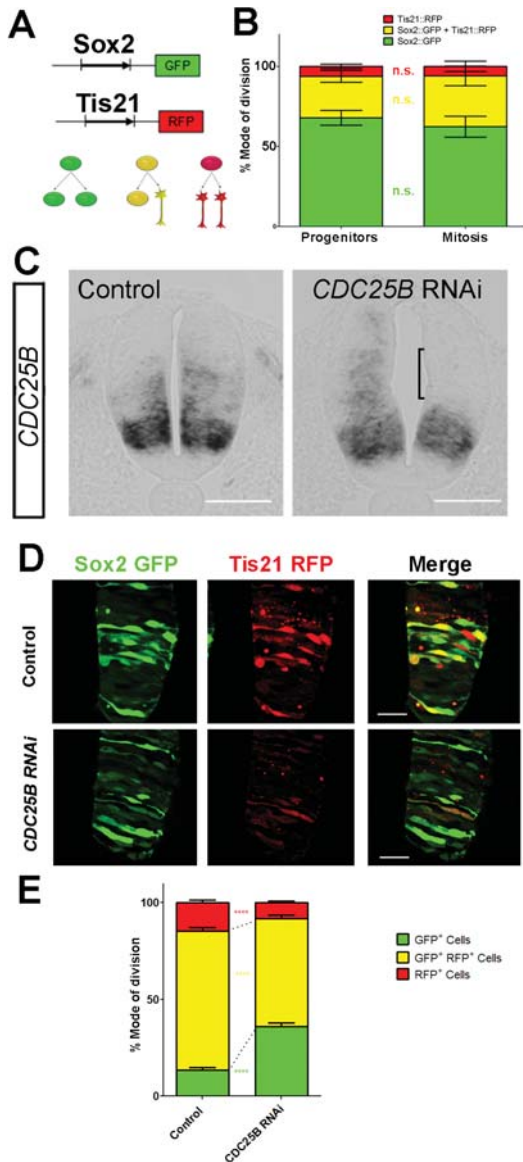

**Figure 4: CDC25B downregulation reduces neurogenic divisions.** **A:** Schematic representation of the Sox2::GFP Tis21::RFP labelling strategy. A GFP expressing cell (green cell) corresponds to a PP division, a cell expressing both GFP and RFP (yellow cell) corresponds to a PN division, and a RFP expressing cell (red cell) corresponds to a NN division. **B:** Histograms representing the percentage of cells expressing the reporters Sox2::GFP and Tis21::RFP at HH17 in the entire progenitor's population or in progenitors performing mitosis identified with phospho-histone-3 (PH3) immunostaining. Note that these results are not significantly different. These data are obtained from 3 different experiments, 7 embryos, 365 progenitors, and 79 mitoses. **C:** In situ hybridization for CDC25B on HH17 spinal cord, 24 hours post electroporation of Control RNAi (left panel) and CDC25B RNAi (right panel). The reduction of CDC25B expression in the intermediate region is indicated by a bracket. Cells were electroporated on the right side of the neural tube (not shown). Scale bars indicate 100  $\mu$ m. **D:** Cross-sections of chick spinal cord at HH17, 24 hours after co-electroporation of Sox2p::GFP and Tis21p::RFP reporter, plus a control RNAi vector or the CDC25B-RNAi vector. Scale bars indicate 50  $\mu$ m. **E:** Histograms representing the percentage of progenitors expressing Sox2p::GFP and Tis21p::RFP 24hrs after co-electroporation of a control vector or a CDC25B RNAi vector. 4 experiments include 7 control embryos and 15 CDC25B RNAi embryos.



279 neural tube (Figure 4C bracket). We therefore determine the impact of *CDC25B*  
280 downregulation on the mode of division in progenitors located in this domain. We co-  
281 electroporate the biomarkers with either the *CDC25B*-RNAi plasmid, or the control  
282 scrambled plasmid at stage HH 11 and quantified the number of green (PP), yellow (PN)  
283 and red (NN) cells 24 hours later at stage HH 17 (Figure 4D-E). When compared to the  
284 control scrambled RNAi, the *CDC25B* RNAi induces a massive increase in green PP  
285 progeny ( $13.4 \pm 1.31\%$  to  $35.1 \pm 1.82\%$ ), mostly at the expense of yellow PN progeny (from  
286  $72.1 \pm 1.85\%$  to  $56.2 \pm 1.70\%$  and to some extent, of the red NN progeny (from  $14.6 \pm$   
287  $1.43\%$  to  $8.74 \pm 0.8\%$ , Figure 4E).

288 This observation indicates that *CDC25B* downregulation hindered neuron  
289 production by maintaining proliferative divisions at the expense of asymmetric and  
290 symmetric neurogenic divisions.

291

### 292 ***CDC25B* Gain-of-function promotes asymmetric and symmetric neurogenic** 293 ***divisions***

294 We then use the same strategy to test how *CDC25B* gain-of-function affects the  
295 mode of division. At the time of electroporation (stage HH11), the neural tube contains  
296 essentially self-expanding progenitors (Le Dreau et al., 2014; Saade et al., 2013). 24 hours  
297 later, (stage HH17), the repartition of the modes of division is not the same in dorsal and  
298 ventral control conditions. Dorsal neural tube contains mainly self-expanding progenitors  
299 ( $66.3\%$  Sox2<sup>+</sup> cells, Figure 5A, B) and (Le Dreau et al., 2014), whereas ventral neural tube  
300 encloses essentially neurogenic progeny ( $61.7\%$  of Sox2<sup>+</sup>/Tis21<sup>+</sup> cells, Figure 5A, B) and  
301 (Saade et al., 2013), in accordance with the temporality of neurogenesis which progresses  
302 from ventral to dorsal.

303 In the dorsal neural tube, *CDC25B* gain-of-function leads to a reduction in the  
304 percentage of PP progeny (from  $66.3 \pm 2.6$  to  $38.6 \pm 2.1\%$ ) and a concomitant, increase in  
305 the percentage of PN neurogenic progeny (from  $25.9 \pm 2.1$  to  $50.1 \pm 1.9\%$ ). In this tissue,  
306 the percentage of NN progeny progresses only slightly (from  $7.8 \pm 1.2$  to  $11.3 \pm 1\%$ , Figure  
307 5B). This observation indicates that *CDC25B* gain-of-function in early steps of  
308 neurogenesis reduces proliferative divisions and increases asymmetric neurogenic  
309 divisions.

310 In the ventral neural tube, *CDC25B* gain-of-function induces a massive reduction of  
311 proliferative progeny (from  $39.3 \pm 1.3\%$  to  $6.9 \pm 1\%$ ) and led to an increase in NN  
312 progeny (from  $12.7 \pm 1.1\%$  to  $40.7 \pm 2.7\%$ ), without significantly modifying the

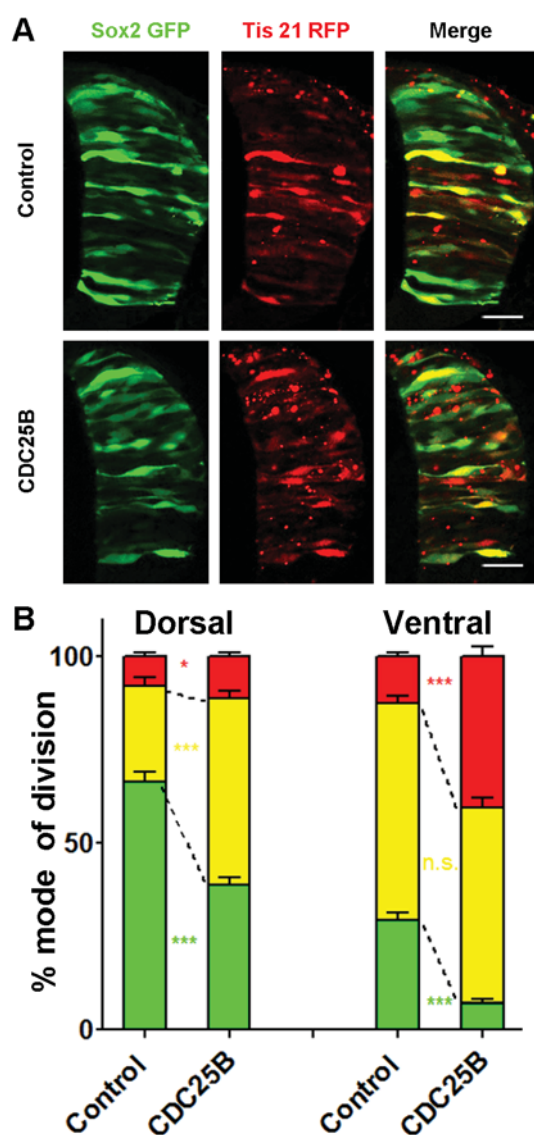

**Figure 5: CDC25B gain-of-function promotes neurogenic divisions.**

**A:** Representative cross-sections of HH17 chick spinal cord, 24 hours after electroporating Sox2p::GFP and Tis21p::RFP reporters, plus a control vector pccRE::lacZ, or a pccRE::CDC25B vector. Scale bars indicate 50  $\mu$ m. **B:** Histograms representing the percentage of progenitors expressing Sox2p::GFP and Tis21p::RFP 24 hours after co-electroporation with control or CDC25B vectors in the dorsal and ventral spinal cord. Data represent the means  $\pm$  sem. Data represent 3 different experiments with 5 and 10 embryos in dorsal and ventral respectively under control condition and 5 and 6 embryos in dorsal and ventral respectively under CDC25B gain-of-function condition.

313 percentage of PN cells (from 58 +/- 2% to 52.3 +/- 2.8%, Figure 5B). Thus, CDC25B ectopic  
314 expression in a more advanced neural tissue reduces proliferative divisions and increases  
315 terminal neurogenic divisions.

316 Together, these results suggest that CDC25B activity in neural progenitors reduces  
317 proliferative divisions, promoting either asymmetric or symmetric neurogenic divisions,  
318 depending on the receiving neural tissue.

### 319 **Mathematical modelling reveals that cell cycle duration is not instrumental in** 320 **controlling the mode of division**

321 To test quantitatively our data from a dynamical point of view, we formalize in  
322 mathematical terms, the current understanding of what happens in this biological system  
323 (Figure 6A). We consider a population of progenitors,  $P(t_0)$ , at time  $t_0$ , and we assume that  
324 their different modes of division result in expanding either the pool of progenitors  $P(t)$   
325 through proliferative divisions (PP divisions) or the pool of neurons  $N(t)$  by neurogenic  
326 divisions (PN and NN divisions).

327 Denoting  $\eta$ , the rate at which P cells undergo divisions per unit time (which depends  
328 only on the cell cycle duration), the growth rates of the two pools only depend on the relative  
329 magnitude of each mode of division.

330 Denoting  $\alpha_{PP}$ ,  $\alpha_{PN}$  and  $\alpha_{NN}$  the corresponding proportions of the modes of division  
331 (their sum is 1), the growth rates of the two pools (i.e. their time derivatives  $\dot{P}(t)$  and  $\dot{N}(t)$   
332 for Progenitors and Neurons respectively) can then be directly formalized as:

$$\begin{cases} \dot{P}(t) &= -\eta P(t) + 2\alpha_{PP}\eta P(t) + 1\alpha_{PN}\eta P(t) \\ \dot{N}(t) &= +2\alpha_{NN}\eta P(t) + 1\alpha_{PN}\eta P(t) \end{cases}$$

333

334 In this model, the evolution of the pool of progenitors is governed by  $\alpha_{PP}$  and  $\alpha_{NN}$   
335 (because  $\alpha_{PN}$  does not affect the pool of progenitors, only the pool of neurons). Denoting  
336  $\gamma = \alpha_{PP} - \alpha_{NN}$  the difference between the two proportions, we then have that  $\gamma=1$  ( $\alpha_{PP}=1$ ,  $\alpha_{NN}$   
337  $=0$ ) corresponding to purely self-expanding progenitors and  $\gamma=-1$  ( $\alpha_{PP}=0$ ,  $\alpha_{NN}=1$ )  
338 corresponding to fully self-consuming progenitors. Hence  $\gamma$  is a good indicator of the  
339 balance between proliferation and differentiation of the progenitors.

340 Using  $\gamma$ , the model can be rewritten more simply as:

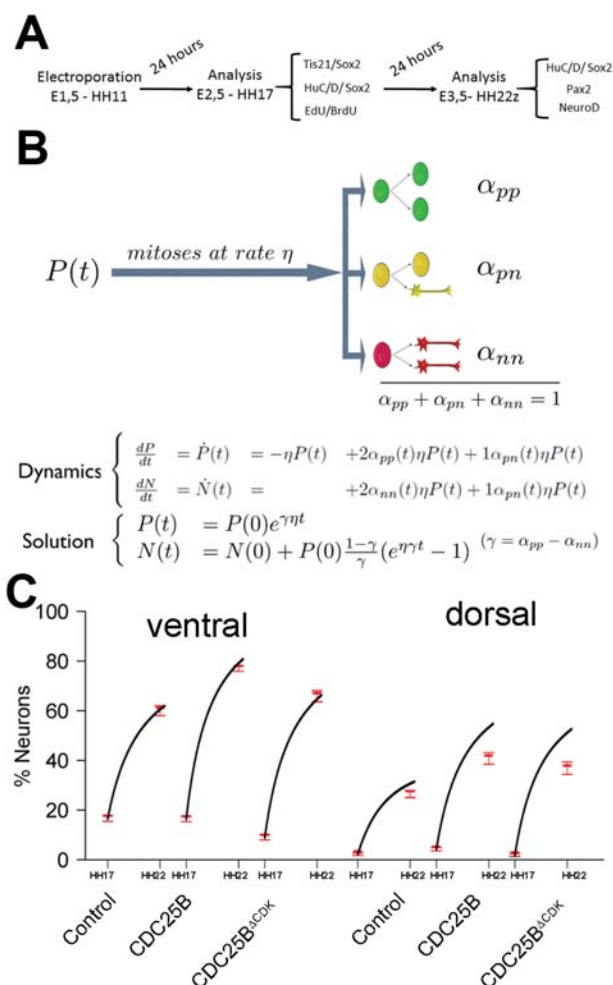

**Figure 6: mathematical model linking the mode of division to the fraction of neurons generated.** **A:** Scheme of the experimental time course. Neural tubes are electroporated at stage HH11. 24 hours (HH17) and 48 hours (HH 22) post electroporation cell cycle parameters, mode of division and progenitor/neuronal markers are analyzed. **B:** Illustration of our mathematical model. We consider  $P(t)$  a pool of progenitors at a given time with a mitotic rate  $\eta$ . These mitoses lead up to three kinds of mode of division: a fraction  $\alpha_{pp}$  producing symmetric proliferative divisions yielding two progenitors, a fraction  $\alpha_{pn}$  producing asymmetric divisions yielding one progenitor and one neuron (a precursor of), and a fraction  $\alpha_{nn}$  producing symmetric neurogenic divisions yielding two neurons. The equations display the dynamics governing the pools of progenitors  $P(t)$  and neurons  $N(t)$  at any time  $t$ . These dynamics are solved for a given initial condition  $P(0)$ ,  $N(0)$ , and we obtained the state of the system any time later (Solution, details in Supplement information text 1). **C:** Predictions of the kinetics of the neuronal fraction between stage HH 17 and 22 in the different conditions, compared to the mean  $\pm$  confidence interval 95% (in red) of the experimental data at stage HH17 and HH22 (from Figure 2F and 7C).

$$\begin{cases} \dot{P}(t) &= \gamma\eta P(t) \\ \dot{N}(t) &= (1 - \gamma)\eta P(t) \end{cases}$$

341

342 An explicit solution is:

$$\begin{cases} P(t) &= P(0)e^{\gamma\eta t} \\ N(t) &= N(0) + P(0)\frac{1-\gamma}{\gamma}(e^{\eta\gamma t} - 1) \end{cases}$$

343

344 This equation means that if the quantities of progenitors and neurons are  
345 determined at a given time  $t$  ( $P(0)$ ,  $N(0)$ ), e.g. at HH17, we can compute the expected  
346 number of progenitors and neurons at any time later, e.g. at HH22, provided that the modes  
347 of division and cell cycle times can be considered constant over the considered period. Full  
348 details of the mathematical work are given in Supplement Information Text 1.

349 We then compare quantitatively the experimental data to the predictions based on  
350 our current hypotheses. This comparison is surprisingly auspicious for the control and gain-  
351 of-function experiments in the ventral zone (Figure. 6C, left). In this zone, considering the  
352 ratio between the two pools at HH17 (e.g. the measured fractions of neurons), the  
353 measured cell cycle duration (12 hours), the set of modes of division measured at HH17,  
354 and the hypothesis that those modes of divisions keep unmodified during 24 hours, the  
355 model predicts with good accuracy the ratios between the two pools at HH22. In the dorsal  
356 zone, the model correctly predicts the control condition, and it confirms the tendency of  
357 CDC25B gain-of-function to promote a greater neuron fraction, albeit with some  
358 quantitative discrepancy (the model overestimates the fraction of neurons). This suggests  
359 that, notwithstanding biological complexity, the general picture of a pool of progenitors  
360 among which cells undergo different modes of division, appears relevant.

361 Our model is built on the assumption that all cells undergo mitosis at the same rate,  
362 and that the fate of any mitosis is stochastic and probabilistically distributed according to  
363 the fraction of dividing cells undergoing PP, PN or NN divisions, a common division rate  
364 for all progenitors associated with probabilistic fates (Supplement Information Text 1  
365 paragraph 3.1). In this picture, the proportion of mode of division controls directly the  
366 numbers of progenitors and neurons that are generated. However, the model is compatible  
367 with an alternative interpretation, in which the three modes of division correspond to  
368 specific division rates associated with deterministic fates (Supplement Information Text 1,



369 paragraph 3.2). In this case, each population of progenitors has a specific mean cycling  
370 time and the cell cycle time is instrumental to the mode of division. Namely, cycling at rate  
371  $\alpha_{PP}\eta$  would result in a PP division, cycling at rate  $\alpha_{PN}\eta$  would result in a PN division, and  
372 cycling at rate  $\alpha_{NN}\eta$  would result in a NN division. Therefore, the numbers and proportions  
373 of progenitors / neurons at HH22 would result from the difference between cell cycle times  
374 associated with modes of division. We compute these putative cell cycle times based on  
375 the data obtained in the three conditions and the two zones (Table 1). The wide range of  
376 specific cycle times, i.e., from 17 to 172.7 hours, is incompatible with data usually recorded  
377 (reviewed in (Molina & Pituello, 2016)). This suggests that, in the time window of our  
378 analyses, the observed evolution of progenitors and neurons cannot be directly explained  
379 by limited differences in cell cycle durations among the three modes of division.

380

### 381 **CDC25B acts on asymmetric neurogenic division independently of CDK interaction**

382 One prediction of our model is that neurogenesis might be affected independently  
383 of cell cycle length modification. To test whether the CDC25B-induced G2 phase  
384 modification is instrumental in promoting neurogenesis, we use a mutated form of CDC25B  
385 that was shown not to affect cell cycle kinetics. The mutation prevents CDC25B–CDK1  
386 interactions without affecting CDC25B phosphatase activity (Sohn et al., 2004).  
387 Accordingly, expressing this mutated form of the phosphatase called CDC25B<sup>ΔCDK</sup>, does  
388 not modify G2 phase length in neuroepithelial progenitors (Figure 7A, red curve). 24 hours  
389 after electroporation of CDC25B<sup>ΔCDK</sup> in the dorsal neural tube, we observe a reduction of  
390 PP progeny (from 66.3 +/-2.7% to 40.2 +/- 2.5%), an increase in PN progeny (from 25.9  
391 +/- 2.1% to 51.1 +/- 2.2%), and no effect in NN progeny (from 7.8 +/- 1.2% to 8.0 +/- 1.1%,  
392 Figure 7B). In this context, the fraction of HuC/D<sup>+</sup> neurons generated 48 hours following  
393 CDC25B<sup>ΔCDK</sup> expression increases from 30.7 +/- 1.3% to 40.4 +/- 2.5%. (Figure 7C).  
394 Similarly, the percentage of Pax2<sup>+</sup>neurons is increased from 11.3 +/- 1 % to 18.3 +/- 1.3%  
395 (Figure 7D).

396 In the ventral neural tube, CDC25B<sup>ΔCDK</sup> overexpression leads to a reduction of PP  
397 progeny (29.3 +/- 2.1% vs 16.6 +/- 1.2%), an increase in PN progeny (58 +/- 2% vs 70.7  
398 +/- 1.4%) and no effect on NN progeny (12.7 +/- 1.1% vs 12.7 +/- 1.1%, Figure 7B). In both  
399 ventral and dorsal domains, the CDK mutated form promotes asymmetric neurogenic  
400 divisions but is not able to promote terminal symmetric ones. In accordance with the effects  
401 on the mode of division, in the ventral neural tube, CDC25B<sup>ΔCDK</sup> induces a slight but non-  
402 significant increase of HuC/D expression (Figure 7C). We take advantage of our

**Table 1**

|                                                             | $T_{PP}$ (hours) | $T_{PN}$ (hours) | $T_{NN}$ (hours) | $T_c$ (hours) |
|-------------------------------------------------------------|------------------|------------------|------------------|---------------|
| Control dorsal neural tube                                  | 18,1             | 46,3             | 154,1            | 12,0          |
| CDC25B dorsal neural tube                                   | 31,1             | 23,9             | 106,0            | 12,0          |
| CDC25B <sup><math>\Delta</math>cdk</sup> dorsal neural tube | 29,8             | 23,5             | 150,0            | 12,1          |

  

|                                                              |       |      |      |      |
|--------------------------------------------------------------|-------|------|------|------|
| Control ventral neural tube                                  | 41,0  | 20,7 | 94,5 | 12,0 |
| CDC25B ventral neural tube                                   | 172,7 | 22,9 | 29,5 | 12,0 |
| CDC25B <sup><math>\Delta</math>cdk</sup> ventral neural tube | 72,2  | 17,0 | 94,7 | 12,0 |

**Table 1. Putative time it would take to achieve the three kinds of division under a model which assumes that only cycle time determines the fate output.** Full consequences derived from this assumption are given in Supplement Information Text 1, section 3.2. Basically, such an assumption would imply that cycling rates associated with each mode of division should be proportional to the observed fraction of that mode. If we observe, for instance, 60% PP-divisions and 10% NN-divisions (like it is about the case in the Control dorsal), then a NN-division should take 6 times as long as a PP-division. If we exclude such a possibility, then the distribution of fates cannot be exclusively determined by differences in fate-based cycle times. It does not exclude that a given kind of fate (e.g. proliferative divisions PP) could require a longer time to be achieved than others, it excludes that such differences would suffice per se to explain the differences between the fractions of fates.

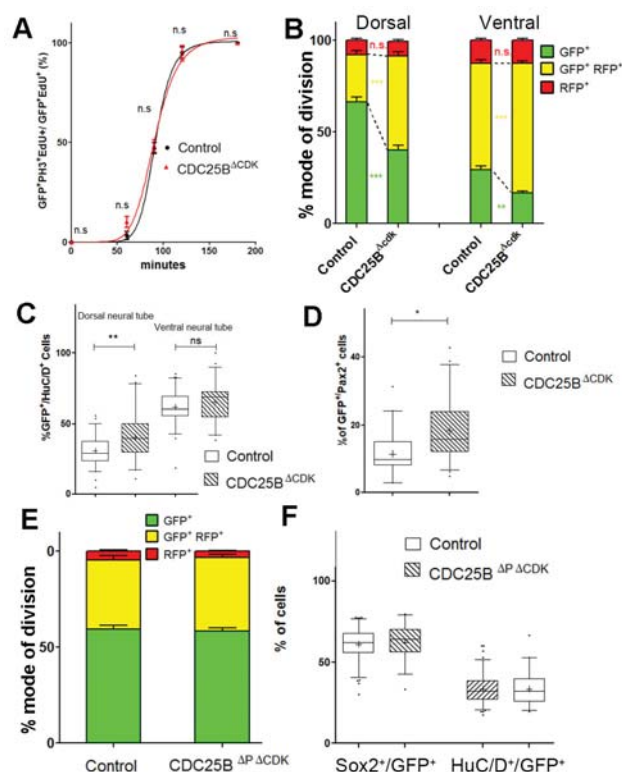

**Figure 7: CDC25B gain-of-function promotes neurogenesis independently of CDK interaction.** **A:** Curves representing the progression of EdU/PH3 co-labeled nuclei with increasing EdU exposure times: control (black), CDC25B $\Delta$ CDK (red). Note that the curve for the CDC25B $\Delta$ CDK condition is similar to the control, indicating an absence of effect on G2 length. **B:** Histograms representing the percentage cells expressing Sox2p::GFP and Tis21p::RFP 24 hours after co-electroporation with control or CDC25B $\Delta$ CDK vectors in the dorsal or ventral spinal cord. Data represent the means +/- sem. Data represent 3 different experiments with 5 and 10 embryos in dorsal and ventral respectively under control conditions and 4 and 9 embryos in dorsal and ventral respectively for CDC25B $\Delta$ CDK gain-of-function. **C:** Box and whisker plots (5/95 percentile) comparing the percentage of HuC/D+ cells within the electroporated population in control or CDC25B $\Delta$ CDK gain-of-function experiments in the dorsal or ventral neural tube at HH22. Data represent 3 different experiments with 13 and 6 embryos in dorsal and ventral respectively under control conditions and 6 and 3 embryos in dorsal and ventral respectively for CDC25B $\Delta$ CDK gain-of-function. **D:** Box and whisker plots (5/95 percentile) comparing the percentage of Pax2 positive cells in the dorsal neural tube at HH22. Data from 3 different experiments with 8 embryos for control conditions, and 11 embryos for CDC25B $\Delta$ CDK gain-of-function. The cross represents the mean value. **E:** Histograms representing the percentage of progenitors expressing Sox2p::GFP and Tis21p::RFP at HH17, 24h after electroporation of a control or CDC25B $\Delta$ P $\Delta$ CDK expressing vector in the dorsal half of the spinal cord. Data from 3 different experiments with 6 embryos for the control, and 9 embryos CDC25B $\Delta$ P $\Delta$ CDK. **F:** Box and whisker plots (5/95 percentile) comparing the percentage of Sox2+ or HuC/D+ cells within the electroporated population in the control or CDC25B $\Delta$ P $\Delta$ CDK gain-of-function experiments in the dorsal spinal cord at HH17. Data from 3 different experiments with 11 embryos under control conditions and 6 embryos for CDC25B $\Delta$ P $\Delta$ CDK. The cross indicates the mean value.

403 mathematical model to determine whether this slight increase in neuron production is  
404 coherent with the fact that the mutated form does not promote NN divisions, and the  
405 number of neurons predicted is in agreement with the experimental data (Figure 6C). To  
406 determine whether CDC25B<sup>ΔCDK</sup> function on asymmetric division and neuronal  
407 differentiation requires phosphatase activity, we use a form of the protein containing an  
408 additional point mutation inactivating the catalytic domain (CDC25B<sup>ΔPΔCDK</sup>). This construct  
409 does not affect the mode of division at 24 hours (Figure 7E). 48 hours post electroporation  
410 this mutated form does not modify NeuroD reporter expression (Supplement Figure 3), the  
411 percentage of HuC/D<sup>+</sup> neurons or the percentage of Sox2<sup>+</sup> progenitors populations (Figure  
412 7F), indicating that the phosphatase activity is required for the neurogenic function of  
413 CDC25B.

414         Altogether, these results show that the CDC25B phosphatase is necessary and  
415 sufficient to promote neurogenesis via a modification of the mode of division. Importantly,  
416 CDC25B<sup>ΔCDK</sup> stimulates asymmetric neurogenic divisions and neuronal differentiation  
417 without affecting the duration of the G2 phase. This opens the possibility that the  
418 phosphatase possesses a cell cycle independent neurogenic function.

## 419 **DISCUSSION**

420

421 An important issue in the field of neurogenesis concerns the implication of cell cycle  
422 function during neuron production (Agius et al., 2015). Here, we confirm in mammals our  
423 previous observations in birds, that the G2/M cell cycle regulator CDC25B phosphatase is  
424 required to finely tune neuronal production in the neural tube. Gain-of-function experiments  
425 performed in the chick neural tube reveal that CDC25B activity is sufficient to modify the  
426 mode of division of neural progenitors and to promote neuronal differentiation  
427 concomitantly with a shortening of the G2 phase length. We demonstrate that CDC25B  
428 expression in neural progenitors induces a shift from proliferative to asymmetric  
429 neurogenic divisions independently of any CDK interaction but we find that this interaction  
430 is required to stimulate neurogenic symmetric terminal divisions (Figure 8A). Our results  
431 suggest a dual machinery downstream of CDC25B during the course of neurogenesis  
432 (Figure 8B). In one instance CDC25B activity on symmetric neurogenic division is  
433 dependent on its interaction with CDK1, while asymmetric neurogenic divisions are  
434 promoted by CDC25B independently of its interaction with CDK1, indicating that it involves  
435 a new substrate of the phosphatase (Figure 8B).

### 436 **CDC25B is required for efficient neuron production in mammals**

437 In mammals three CDC25s (A, B, C) have been characterized, whereas only two  
438 CDC25s (A and B) have been found in chicken (Agius et al., 2015). In mouse, CDC25A  
439 loss-of-function is embryonic lethal, whereas loss-of-function of CDC25B or C or both has  
440 no apparent phenotype except female sterility (Boutros et al., 2007). Crossing our floxed  
441 mice to ubiquitous Cre: PGK-Cre<sup>m</sup> (Lallemand, Luria, Haffner-Krausz, & Lonai, 1998) also  
442 results in female sterility (data not shown). CDC25A has been described playing a major  
443 role in the G1-S transition and is capable of compensating the loss-of-function of the other  
444 CDC25 members. In the mouse embryonic neural tube, both CDC25A and CDC25C  
445 display a broad expression pattern, while CDC25B is mainly expressed in domains where  
446 neurogenesis occurs (Agius et al., 2015) and Figure 1. The conditional loss-of-function in  
447 the mouse CNS, shows for the first time that CDC25B is involved simultaneously in the  
448 control of G2 phase length and of spinal neurogenesis. This observation substantiates our  
449 data showing that CDC25B downregulation, performed using RNAi in chicken embryo,  
450 induces a reduction in neurogenesis (Peco et al., 2012). Two other studies link CDC25B  
451 and neurogenesis. First in *Xenopus*, FoxM1 and CDC25B loss-of-function has been shown  
452 to reduce expression of neuronal differentiation markers, but not early neuroectoderm  
453 markers (Ueno et al., 2008). In this context, epistatic analysis shows that FoxM1 loss-of-



454 function can be rescued by CDC25B gain-of-function (Ueno et al., 2008). Second, MCPH1  
455 knock out mice display a microcephalic phenotype due to an alteration of the Chk1-Cdc25-  
456 Cdk1 pathway. Indeed, MCPH1 mutants display a decreased level of the inhibitory Chk1  
457 kinase localized to centrosomes, leading to increased Cdc25B and Cdk1 activities. A  
458 premature activation of Cdk1 leads to an asynchrony between mitotic entry and  
459 centrosome cycle. This disturbs mitotic spindle alignment, promoting oblique orientation  
460 and precocious neurogenic asymmetric divisions (Gruber et al., 2011). Moreover, the  
461 reduced neurogenic production in the MCPH1 loss-of-function can be restored by a  
462 concomitant Cdc25B loss-of-function, demonstrating the phosphatase's pivotal role in the  
463 neurogenic phenotype. Altogether, these observations indicate that CDC25B regulation is  
464 broadly used during nervous system development among vertebrate species.

465

### 466 **CDC25B changes the mode of division depending on neural progenitor status.**

467 CDC25B downregulation reduces the transition from proliferative to both  
468 asymmetric and terminal symmetric neurogenic divisions. To be able to clarify the role of  
469 CDC25B on both types of division, we use the cell cycle cis-regulatory element combined  
470 with the rapid degradation of CDC25B at the end of the M phase, to reproduce the  
471 endogenous cyclic expression of the phosphatase (Korner et al., 2001). In addition, we  
472 take advantage of the fact that the progenitor population in the dorsal spinal cord is usually  
473 considered younger than its ventral counterpart (Kicheva et al., 2014; Saade et al., 2013),  
474 and that neuron production progresses from ventral to dorsal in the neural tube (Peco et  
475 al., 2012). Using this paradigm, we show that CDC25B gain-of-function promotes  
476 asymmetric or symmetric neurogenic divisions, depending on the population of progenitors  
477 targeted. In the dorsal neural tube, CDC25B gain-of-function increases asymmetric  
478 neurogenic divisions compared to control conditions, i.e., the phosphatase stimulates the  
479 shift from PP to PN divisions (Figure 8A). In the ventral neural tube, the gain-of-function  
480 leads to an increase in NN divisions at the expense of PP divisions, the percentage of PN  
481 divisions being unchanged (Figure 8A). Based on the quantitative analysis of the progenitor  
482 populations in our different conditions, we propose that ectopic expression of the  
483 phosphatase can be interpreted in different ways depending on the context, and that the  
484 phosphatase's phenotype can be generated in more than one manner. We find that  
485 CDC25B has the capacity to convert PP into PN in a young tissue, while in an older tissue  
486 CDC25B can convert PP into either PN or NN. With respect to what occurs in an older  
487 tissue, either the phosphatase converts PP into PN or NN, or the phosphatase initially  
488 promotes PP into PN and subsequently, using the principle of communicating vessels in

489 an older tissue, promotes PN into NN. We speculate that CDC25B acts as a maturing  
490 factor in the progression from stem pool to differentiated neurons, and we suggest that this  
491 element of the cell cycle machinery has been coopted to regulate independently cell cycle  
492 progression and neurogenesis.

### 493 494 **Mathematical modelling of the neuronal fraction in the dorsal neural tube**

495 The model predicts with accuracy the ratio of neuron in the three conditions in the  
496 ventral neural tube and in the control condition in the dorsal neural tube. In the latter, in  
497 CDC25B and CDC25B<sup>ΔCDK</sup> gain-of-functions, the model calculates a larger fraction of  
498 neurons than what is observed experimentally (Figure 6C). We have several hypotheses  
499 to explain this discrepancy between the predictions and the data. First of all, at HH11,  
500 endogenous CDC25B is expressed in the ventral neural tube but not in the dorsal neural  
501 tube. This means that electroporation causes a true gain-of-function in the dorsal domain,  
502 while in the ventral domain there is only a dosage modification of a component already  
503 present. Then, CDC25B regulation is complex, and an active degradation mechanism in  
504 the dorsal neural tube could attenuate the gain-of-function. Another possibility is that  
505 electroporated gain-of-function, which is also cell cycle dependent, could be less efficient  
506 with time and thereby lead to fewer neurons than expected. Alternatively, the signaling  
507 pathway downstream of CDC25B could be expressed differently in the ventral and dorsal  
508 neural tubes, and this could limit the gain-of-function effect in the dorsal neural tube. All  
509 things considered, we regard the discrepancy between our predictions and our data as a  
510 challenging milestone that deserves further investigation. One can always formalize an “ad  
511 hoc” model for each hypothesis mentioned above in order to fit the observed fractions of  
512 neurons, since free parameters can always be adjusted at will. However, we prefer to  
513 stress that the standard model for these dynamics still requires identifying other elements  
514 in order to reconcile the predictions with the data of this study.

### 515 516 **CDC25B promotes asymmetric neurogenic divisions independently of CDK 517 interaction but symmetric neurogenic divisions require CDK interaction**

518 CDC25B<sup>ΔCDK</sup> turns proliferative divisions into asymmetric neurogenic divisions, but  
519 this mutated protein cannot promote symmetric neurogenic divisions (Figure 8A). This  
520 result suggests that CDC25B phosphatase affects neurogenesis via two molecular  
521 pathways, one dependant and one independent of CDK interaction (Figure 8B). A follow-  
522 up to this work could be to characterise the players downstream of CDC25B that are CDK  
523 independent. Other CDC25B substrates have been characterised, such as steroid

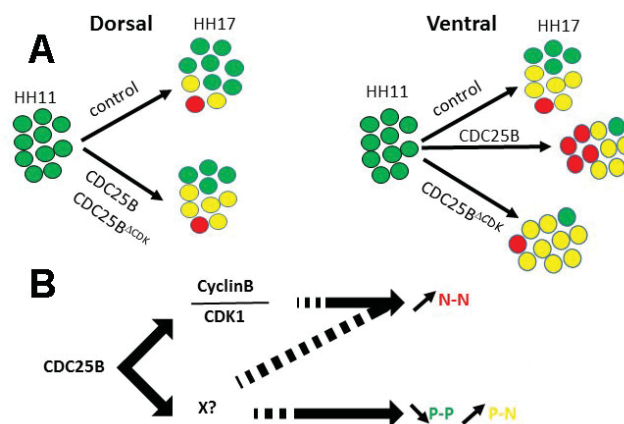

**Figure 8: Schematic of CDC25B modes of action. A:** Different activities of CDC25B on neuroepithelial progenitors. HH11 dorsal neural tube electroporated with control vector, exhibit at HH17 mainly proliferative progenitors schematized using 7 green (PP), 2 yellow (PN) and 1 red ball (NN). CDC25B or CDC25B<sup>ΔCDK</sup> gain-of-function increase asymmetric neurogenic progeny (PN, yellow). In the ventral neural tube, control conditions, lead to a majority of asymmetric neurogenic divisions PN (yellow). CDC25B gain-of-function increases symmetric terminal neurogenic divisions NN (red) whereas CDC25B<sup>ΔCDK</sup> gain-of-function increases asymmetric neurogenic divisions PN (yellow). **B:** CDC25B dual activity on CDK/cyclinB complexes and/or on an unknown factor X reduces PP progeny and promotes PN progeny or stimulates NN progeny.

524 receptors (Ma, Liu, Ngan, & Tsai, 2001), or the peri-centriolar material component Kizuna  
525 (Thomas et al., 2014). A recent analysis using microarrayed Tyr(P) peptides representing  
526 confirmed and theoretical phosphorylation motifs from the cellular proteome, identifies  
527 more than 130 potential CDC25B substrates (Zhao et al., 2015). These substrates are  
528 implicated in signalling pathways like Delta/Notch or Wnt, in microtubule dynamics,  
529 transcription, epigenetic modifications, mitotic spindle or proteasome activity (Zhao et al.,  
530 2015), and all of them could play role in cell fate choice (Akhtar et al., 2009; Aubert,  
531 Dunstan, Chambers, & Smith, 2002; Das & Storey, 2012; Götz & Huttner, 2005; Hämmerle  
532 & Tejedor, 2007; Jiang & Hsieh, 2014; Kimura, Miki, & Nakanishi, 2014; Li et al., 2012;  
533 MuhChyi, Juliandi, Matsuda, & Nakashima, 2013; Olivera-Martinez et al., 2014; Sato,  
534 Meijer, Skaltsounis, Greengard, & Brivanlou, 2004; Schwartz & Pirrotta, 2007; Vilas-Boas,  
535 Fior, Swedlow, Storey, & Henrique, 2011).

536         Understanding CDC25B function also depends upon identifying the intracellular  
537 localisation of CDC25B activity required for neurogenesis. CDC25B is present in the  
538 cytoplasm and/or nucleus according to the cell cycle phase. Moreover, CDC25B protein  
539 has been shown to accumulate asymmetrically around the mother centrosome during S  
540 and early G2 and it is finally evenly distributed on both centrosomes at late G2 and during  
541 mitosis (Boutros & Ducommun, 2008; Dutertre et al., 2004). In mouse *Mcp1*- deficiency,  
542 neurogenesis impairment has been linked to premature activation of *Cdc25B* expression  
543 on centrosomes, leading to imbalanced centrosome maturation and defects in mitotic  
544 spindle misalignment (Gruber et al., 2011). As shown here, we could not detect any  
545 variation in orientation or size of the mitotic spindle following CDC25B ectopic expression.  
546 This suggests that CDC25B centrosomal expression might regulate molecular cascades  
547 involved in neurogenesis in parallel or downstream of the mitotic spindle. In this line, *Shh*  
548 induced symmetric recruitment of PKA to the centrosome during neural progenitor  
549 divisions, has been involved in promoting expansion of the progenitor pool (Saade et al.,  
550 2017). Similarly, *Mib1*, a known regulator of Notch signalling, has been characterized as  
551 an intrinsic fate determinant whose asymmetric localization with centriolar satellite material  
552 of proliferating progenitors induces neurogenesis (Tozer, Baek, Fischer, Gojame, & Morin,  
553 2017).

554         Modifying signalling pathways controlling neurogenesis could also explain the role  
555 of CDC25B in promoting symmetric neurogenic divisions that require the interaction  
556 between CDC25B and CDK and/or a modification of the G2 phase length. Various  
557 experiments have linked G2 phase length with the modulation of signalling pathways such  
558 as Wnt or Delta/Notch (Cisneros, Latasa, Garcia-Flores, & Frade, 2008; Davidson et al.,

559 2009; Latasa, Cisneros, & Frade, 2009; Lee, White, Hurov, Stappenbeck, & Piwnica-  
560 Worms, 2009; Vilas-Boas et al., 2011). In mouse, CDC25A, B and C triple KO (TKO)  
561 exhibits epithelial cells in the small intestine blocked in G1 or G2, accompanied by an  
562 enhanced Wnt signalling activity (Lee et al., 2009). Similarly, in *Drosophila*, the knockdown  
563 of String (a CDC25 ortholog in *drosophila*) results in G2/M arrest and enhances Wnt  
564 signalling (Davidson et al., 2009). In neuroepithelial cells, activation of the Notch signalling  
565 pathway is regulated by cell cycle progression (Cisneros et al., 2008; Murciano, Zamora,  
566 López-Sánchez, & Frade, 2002; Vilas-Boas et al., 2011). Further experiments will be  
567 necessary to understand the possible links between CDC25B and the signalling pathways  
568 that modulate cell fate decisions during neurogenesis.

569

570 In conclusion, we propose that our data illustrate that cell cycle core regulators might  
571 have been coopted to elicit additional functions in parallel to cell cycle control. We show  
572 that a positive cell cycle regulator, CDC25B, unexpectedly promotes differentiation and  
573 reduces proliferative divisions. Cell cycle regulators are routinely described as deregulated  
574 in cancers and are associated with increased proliferation. Understanding their function  
575 outside the cell cycle is therefore crucial to characterising their molecular and cellular  
576 mechanisms of action and to foresee novel therapeutic strategies.



## 577 **MATERIALS AND METHODS**

### 578 **Embryos:**

579 Fertile chicken eggs at 38°C in a humidified incubator yielded appropriately staged  
580 embryos (Hamburger & Hamilton, 1992). Animal related procedures were performed  
581 according to EC guidelines (86/609/CEE), French Decree no. 97/748 and the CNRS  
582 recommendations.

### 583 584 **Generating a *Cdc25B* floxed allele and a *CDC25B<sup>nesKO</sup>* littermates:**

585 Experiments were performed in accordance with European Community guidelines  
586 regarding care and use of animals, agreement from the Ministère de l'Enseignement  
587 Supérieur et de la Recherche number: C3155511, reference 01024.01 and the CNRS  
588 recommendations. To disrupt *Cdc25B* function, we generated a modified allele of *Cdc25B*  
589 (Mouse Clinical Institute, IGBMC, Illkirch). Using Homologous recombination in embryonic  
590 cells (ES), we inserted two LoxP sites, flanking exon 4 to exon 7 of the *Cdc25B* gene  
591 (referred to as Floxed allele). Upon Cre-mediated excision exons 4 to 7 are deleted and  
592 following intron splicing, a premature stop codon is generated, leading to a truncated  
593 protein of 134 aa. The activity of this remaining peptide has been tested in a cellular model  
594 and has no activity (not shown). We first generated a mutant mouse line (*Cdc25B<sup>-/-</sup>*) by  
595 crossing *Cdc25B* floxed mice with *PGK-Cre* mice, resulting in an ubiquitous and permanent  
596 deletion of *Cdc25B*. In order to delete *Cdc25B* activity specifically at the onset of  
597 neurogenesis, we crossed *Cdc25B<sup>fl/-</sup>* mice with transgenic mice expressing the Cre  
598 recombinase under the control of the rat Nestin (*Nes*) promoter and enhancer (Tronche et  
599 al., 1999). The effect of expressing Cre recombinase on proliferation and neurogenesis  
600 was evaluated by comparing *Cdc25B<sup>fl/+</sup>* and *NestinCre;Cdc25B<sup>fl/+</sup>* littermates. As there  
601 were no phenotypic differences between these embryos for any of the parameters that we  
602 measured (not shown), they were both included with the *Cdc25B<sup>fl/-</sup>* littermates in the control  
603 group.

### 604 605 **Statistical analysis of the mouse neuronal phenotype:**

606 For each experiment, at least three independent litters and three different slides per  
607 embryo were analyzed. To compare the number of neuron between control and conditional  
608 mutant embryos, we used a statistical model called the "mixed effect model". This model  
609 contains both the fixed effect i.e., the genotype of the embryo (control or conditional  
610 mutant) - and random effects i.e., the variability induced by the age of the litter and by the

611 embryo nested in the litter. Random effects were excluded using the R software and the  
612 package “nlme”, and we applied the following formula:

```
library(nlme)
result.lme <- lme(Neuron number ~ Genotype , random = ~1|Litter/Embryo,
                  data = data, method="REML")
```

613  
614 To test the effect of the genotype on the number of neuron, we next performed an ANOVA  
615 test. \* p < 0.05; \*\* p < 0.01; \*\*\* p < 0.001

616

### 617 **DNA constructs and *in ovo* electroporation:**

618 *In ovo* electroporation experiments were performed using 1.5- to 2-day-old chickens as  
619 described previously (Peco et al., 2012). Loss and gain of function experiments were  
620 performed using a vector expressing the various human CDC25 isoforms (hCDC25B3,  
621 hCDC25B3<sup>ΔCDK</sup>, hCDC25B3<sup>ΔPΔCDK</sup>) under the control of a cis regulatory element of the  
622 mouse Cdc25B called pccRE. A control vector was generated with the βGal gene  
623 downstream of the pccRE. All gain-of-function experiments were performed at 1.5 μg/μl.  
624 The Sox2p-GFP, Tis21p-RFP, and NeuroD-luciferase constructs were obtained from E.  
625 Marti and used at 1 μg/μl, 0.5 μg/μl and 1 μg/μl, respectively.

626

### 627 ***In situ* hybridization and immunohistochemistry on mouse and chick embryos:**

628 Mouse embryos were dissected in cold PBS and fixed in 4% paraformaldehyde overnight  
629 at 4°C. Then they were embedded in 5% low melting agarose before sectioning on a Leica  
630 vibratome, in 50 μm thick transversal sections. *In situ* hybridization was performed as  
631 published (Lacomme, Liaubet, Pituello, & Bel-Vialar, 2012). Riboprobes to detect  
632 mCdc25B transcripts were synthesized from linearized plasmid containing the full Cdc25B  
633 cDNA (riboprobe sequence available on request). Immunohistochemistry was performed  
634 as described in (Lobjois, Benazeraf, Bertrand, Medevielle, & Pituello, 2004). The  
635 antibodies used were the anti-Pax2 (Covance), guinea pig anti-Tlx3 (gift from C.Birchmeier  
636 (Müller et al., 2005)) and anti-Pax7 (Hybridoma Bank). For chick embryos, proteins or  
637 transcripts were detected on 40 μm vibratome sections, as previously described (Peco et  
638 al., 2012). The antibodies used were: anti-HuC/D (Molecular Probes), anti-Sox2  
639 (Chemicon), anti-PH3 (Upstate Biotechnology), anti-BrdU (mouse monoclonal, G3G4),  
640 anti-BrdU (rat anti-BrdU, AbD Serotec), anti-active caspase 3 (BD Biosciences), and anti-  
641 GFP (Invitrogen).

642

### 643 **Cell proliferation and survival analyses:**

644 Cell proliferation was evaluated by incorporation of 5-ethynyl-2'-deoxyuridine (Click-iT EdU  
645 Alexa Fluor 647 Imaging Kit, Invitrogen). 10  $\mu$ l of 250  $\mu$ M EdU solution were injected into  
646 chicken embryos harvested 30 minutes later, fixed for one hour and processed for  
647 vibratome sectioning. EdU immunodetection was performed according to manufacturer's  
648 instructions. Mitotic cells were detected using anti-PH3. G2-phase length was determined  
649 using the percentage of labeled mitoses (PLM) paradigm (Quastler & Sherman, 1959).  
650 EdU incorporation was performed as described above, except that a similar dose of EdU  
651 was added every 2 hours, and embryos were harvested from 30 to 180 minutes later.  
652 Embryos were fixed and labeled for both EdU and PH3. We then quantified the percentage  
653 of PH3 and EdU co-labeled nuclei with increasing times of exposure to EdU. The  
654 progression of this percentage is proportional to G2-phase duration. Cell death was  
655 analyzed by immunofluorescence, using the anti-active Caspase 3 monoclonal antibody  
656 (BD Biosciences).

657

#### 658 **EdU incorporation in mice:**

659 For EdU staining experiments in mouse, 100  $\mu$ l of 10mg/ml EdU were injected  
660 intraperitoneally into pregnant mice. Litters were harvested 1, 2 or 3 hours following  
661 injection.

662

#### 663 **Imaging and data analysis:**

664 Slices (40  $\mu$ m) were analyzed using a SP5 Leica confocal microscope as described  
665 previously (Peco et al., 2012). Experiments were performed in triplicate. For each embryo,  
666 confocal analyses were performed on at least three slices. Confocal images were acquired  
667 throughout the slices at 3  $\mu$ m z intervals.

668

#### 669 **Tis21::RFP/Sox2::GFP Quantification:**

670 For each experimental slice, Z sections were acquired every 3  $\mu$ m, and blind cell  
671 quantifications were performed on one out of every three Z sections to avoid counting the  
672 same cell twice. For each slice, the percentage of PP, PN and NN divisions is determined  
673 using the sum of counted Z sections. For each experimental condition, the number of  
674 embryos analyzed and of cells counted is indicated in the Figure legend.

675

#### 676 **In Vivo Luciferase Reporter Assay:**

677 Embryos were electroporated with the DNAs indicated together with a NeuroDp-Luciferase  
678 reporter (Saade et al., 2013) and with a renilla-construct (Promega) for normalization. GFP-

679 positive neural tubes were dissected out at 48 hours after electroporation and  
680 homogenized in passive lysis buffer. Firefly- and renilla-luciferase activities were measured  
681 by the Dual Luciferase Reporter Assay System (Promega), and the data are represented  
682 as the mean  $\pm$  sem from at least 14 embryos per experimental condition.

683

684 **Statistics:**

685 Quantitative data are expressed as mean  $\pm$  s.e.m. Statistical analysis was performed using  
686 the GraphPad Prism software. Significance was assessed by performing ANOVA followed  
687 by the Student- Mann-Whitney test, (\* $P$ <0.05, \*\* $P$ <0.01, \*\*\* $P$ <0.001, \*\*\*\* $P$ <0.0001 and n  
688 s non significant).

689 **ACKNOWLEDGMENTS**

690 We are grateful to Dr. Elisa Marti for sharing plasmids. We thank Drs. Bertrand Bénazéraf,  
691 Alice Davy, Bernard Ducommun, Xavier Morin and Alain Vincent for critical reading of the  
692 manuscript and Dr. Caroline Monod for improving the English. We thank the CBI animal  
693 facilities and the Toulouse Regional Imaging platform (TRI) for technical support. We  
694 acknowledge the Developmental Studies Hybridoma Bank, created by the NICHD of the  
695 NIH and maintained at The University of Iowa, Department of Biology, Iowa City, IA 52242  
696 for supplying monoclonal antibodies.

697

698 **FUNDING**

699 Work in FP's laboratory is supported by the Centre National de la Recherche Scientifique,  
700 Université P. Sabatier, Ministère de L'Enseignement Supérieur et de la Recherche  
701 (MESR), the Fondation pour la Recherche sur le Cancer (ARC; PJA 20131200138) and  
702 the Fédération pour la Recherche sur le Cerveau (FRC; CBD\_14-V5-14\_FRC). Manon  
703 Azaïs, Frédéric Bonnet and Mélanie Roussat are recipients of MESR studentships. Angie  
704 Molina is a recipient of IDEX UNITI and Fondation ARC. The funding entities had no role  
705 in study design, data collection and analysis, decision to publish, or preparation of the  
706 manuscript.

707

708 **BIBLIOGRAPHY**

709

710 Agathocleous, M., Locker, M., Harris, W. A., & Perron, M. (2007). A general role of hedgehog in the  
711 regulation of proliferation. *Cell Cycle*, 6(2), 156-159. doi:3745 [pii]

712

713 Agius, E., Bel-Vialar, S., Bonnet, F., & Pituello, F. (2015). Cell cycle and cell fate in the developing nervous  
714 system: the role of CDC25B phosphatase. *Cell Tissue Res*, 359(1), 201-213. doi:10.1007/s00441-014-  
715 1998-2

716

717 Akhtar, M. W., Raingo, J., Nelson, E. D., Montgomery, R. L., Olson, E. N., Kavalali, E. T., & Monteggia, L. M.  
718 (2009). Histone deacetylases 1 and 2 form a developmental switch that controls excitatory synapse  
719 maturation and function. *J Neurosci*, 29(25), 8288-8297. doi:10.1523/jneurosci.0097-09.2009

720

721 Arai, Y., Pulvers, J. N., Haffner, C., Schilling, B., Nusslein, I., Calegari, F., & Huttner, W. B. (2011). Neural stem  
722 and progenitor cells shorten S-phase on commitment to neuron production. *Nat Commun*, 2, 154.  
723 doi:ncomms1155 [pii] 10.1038/ncomms1155

724

725 Aressy, B., & Ducommun, B. (2008). Cell cycle control by the CDC25 phosphatases. *Anticancer Agents Med*  
726 *Chem*, 8(8), 818-824.

727

728 Aubert, J., Dunstan, H., Chambers, I., & Smith, A. (2002). Functional gene screening in embryonic stem cells  
729 implicates Wnt antagonism in neural differentiation. *Nat Biotechnol*, 20(12), 1240-1245.  
730 doi:10.1038/nbt763g

731

732 Bienvenu, F., Jirawatnotai, S., Elias, J. E., Meyer, C. A., Mizeracka, K., Marson, A., . . . Sicinski, P. (2010).  
733 Transcriptional role of cyclin D1 in development revealed by a genetic-proteomic screen. *Nature*,  
734 463(7279), 374-378. doi:10.1038/nature08684 nature08684 [pii]

735

736 Boutros, R., & Ducommun, B. (2008). Asymmetric localization of the CDC25B phosphatase to the mother  
737 centrosome during interphase. *Cell Cycle*, 7(3), 401-406. doi:5295 [pii]

738

739 Boutros, R., Lobjois, V., & Ducommun, B. (2007). CDC25 phosphatases in cancer cells: key players? Good  
740 targets? *Nat Rev Cancer*, 7(7), 495-507. doi:nrc2169 [pii] 10.1038/nrc2169

741

742 Calegari, F., Haubensak, W., Haffner, C., & Huttner, W. B. (2005). Selective lengthening of the cell cycle in  
743 the neurogenic subpopulation of neural progenitor cells during mouse brain development. *J*  
744 *Neurosci*, 25(28), 6533-6538. doi:25/28/6533 [pii] 10.1523/JNEUROSCI.0778-05.2005

745

746 Cayuso, J., & Marti, E. (2005). Morphogens in motion: growth control of the neural tube. *J Neurobiol*, 64(4),  
747 376-387. doi:10.1002/neu.20169

748

749 Cisneros, E., Latasa, M. J., Garcia-Flores, M., & Frade, J. M. (2008). Instability of Notch1 and Delta1 mRNAs  
750 and reduced Notch activity in vertebrate neuroepithelial cells undergoing S-phase. *Mol Cell*  
751 *Neurosci*, 37(4), 820-831. doi:S1044-7431(08)00025-0 [pii] 10.1016/j.mcn.2008.01.011



- 752  
753 Coronado, D., Godet, M., Bourillot, P. Y., Tapponnier, Y., Bernat, A., Petit, M., . . . Savatier, P. (2013). A short  
754 G1 phase is an intrinsic determinant of naive embryonic stem cell pluripotency. *Stem Cell Res*, *10*(1),  
755 118-131. doi:10.1016/j.scr.2012.10.004 S1873-5061(12)00106-7 [pii]
- 756  
757 Das, R. M., & Storey, K. G. (2012). Mitotic spindle orientation can direct cell fate and bias Notch activity in  
758 chick neural tube. *EMBO Rep*, *13*(5), 448-454. doi:10.1038/embor.2012.42 embor201242 [pii]
- 759  
760 Davidson, G., Shen, J., Huang, Y. L., Su, Y., Karaulanov, E., Bartscherer, K., . . . Niehrs, C. (2009). Cell cycle  
761 control of wnt receptor activation. *Dev Cell*, *17*(6), 788-799. doi:S1534-5807(09)00480-8 [pii]  
762 10.1016/j.devcel.2009.11.006
- 763  
764 Delaunay, D., Cortay, V., Patti, D., Knoblauch, K., & Dehay, C. (2014). Mitotic spindle asymmetry: a Wnt/PCP-  
765 regulated mechanism generating asymmetrical division in cortical precursors. *Cell Rep*, *6*(2), 400-  
766 414. doi:10.1016/j.celrep.2013.12.026 S2211-1247(13)00784-5 [pii]
- 767  
768 Dutertre, S., Cazales, M., Quaranta, M., Froment, C., Trabut, V., Dozier, C., . . . Ducommun, B. (2004).  
769 Phosphorylation of CDC25B by Aurora-A at the centrosome contributes to the G2-M transition. *J*  
770 *Cell Sci*, *117*(Pt 12), 2523-2531. doi:10.1242/jcs.01108
- 771  
772 Gonzales, K. A., Liang, H., Lim, Y. S., Chan, Y. S., Yeo, J. C., Tan, C. P., . . . Ng, H. H. (2015). Deterministic  
773 Restriction on Pluripotent State Dissolution by Cell-Cycle Pathways. *Cell*, *162*(3), 564-579.  
774 doi:10.1016/j.cell.2015.07.001
- 775  
776 Gruber, R., Zhou, Z., Sukchev, M., Joerss, T., Frappart, P. O., & Wang, Z. Q. (2011). MCPH1 regulates the  
777 neuroprogenitor division mode by coupling the centrosomal cycle with mitotic entry through the  
778 Chk1-Cdc25 pathway. *Nat Cell Biol*, *13*(11), 1325-1334. doi:10.1038/ncb2342 ncb2342 [pii]
- 779  
780 Götz, M., & Huttner, W. B. (2005). The cell biology of neurogenesis. *Nat Rev Mol Cell Biol*, *6*(10), 777-788.  
781 doi:10.1038/nrm1739
- 782  
783 Hamburger, V., & Hamilton, H. L. (1992). A series of normal stages in the development of the chick embryo.  
784 1951. *Dev Dyn*, *195*(4), 231-272. doi:10.1002/aja.1001950404
- 785  
786 Hernandez-Miranda, L. R., Müller, T., & Birchmeier, C. (2016). The dorsal spinal cord and hindbrain: From  
787 developmental mechanisms to functional circuits. *Dev Biol*. doi:10.1016/j.ydbio.2016.10.008
- 788  
789 Hämmerle, B., & Tejedor, F. J. (2007). A novel function of DELTA-NOTCH signalling mediates the transition  
790 from proliferation to neurogenesis in neural progenitor cells. *PLoS One*, *2*(11), e1169.  
791 doi:10.1371/journal.pone.0001169
- 792  
793 Jiang, Y., & Hsieh, J. (2014). HDAC3 controls gap 2/mitosis progression in adult neural stem/progenitor cells  
794 by regulating CDK1 levels. *Proc Natl Acad Sci U S A*, *111*(37), 13541-13546.  
795 doi:10.1073/pnas.1411939111
- 796

- 797 Kicheva, A., Bollenbach, T., Ribeiro, A., Valle, H. P., Lovell-Badge, R., Episkopou, V., & Briscoe, J. (2014).  
798 Coordination of progenitor specification and growth in mouse and chick spinal cord. *Science*,  
799 *345*(6204), 1254927. doi:10.1126/science.1254927
- 800  
801 Kieffer, I., Lorenzo, C., Dozier, C., Schmitt, E., & Ducommun, B. (2007). Differential mitotic degradation of  
802 the CDC25B phosphatase variants. *Oncogene*, *26*(57), 7847-7858. doi:1210596 [pii]  
803 10.1038/sj.onc.1210596
- 804  
805 Kimura, H., Miki, Y., & Nakanishi, A. (2014). Centrosomes at M phase act as a scaffold for the accumulation  
806 of intracellular ubiquitinated proteins. *Cell Cycle*, *13*(12), 1928-1937. doi:10.4161/cc.28896
- 807  
808 Korner, K., Jerome, V., Schmidt, T., & Muller, R. (2001). Cell cycle regulation of the murine cdc25B promoter:  
809 essential role for nuclear factor- $\gamma$  and a proximal repressor element. *J Biol Chem*, *276*(13), 9662-  
810 9669. doi:10.1074/jbc.M008696200 M008696200 [pii]
- 811  
812 Lacomme, M., Liaubet, L., Pituello, F., & Bel-Vialar, S. (2012). NEUROG2 drives cell cycle exit of neuronal  
813 precursors by specifically repressing a subset of cyclins acting at the G1 and S phases of the cell  
814 cycle. *Mol Cell Biol*. doi:MCB.06745-11 [pii] 10.1128/MCB.06745-11
- 815  
816 Lallemand, Y., Luria, V., Haffner-Krausz, R., & Lonai, P. (1998). Maternally expressed PGK-Cre transgene as  
817 a tool for early and uniform activation of the Cre site-specific recombinase. *Transgenic Res*, *7*(2),  
818 105-112.
- 819  
820 Lange, C., & Calegari, F. (2010). Cdks and cyclins link G1 length and differentiation of embryonic, neural and  
821 hematopoietic stem cells. *Cell Cycle*, *9*(10), 1893-1900. doi:11598 [pii]
- 822  
823 Latasa, M. J., Cisneros, E., & Frade, J. M. (2009). Cell cycle control of Notch signaling and the functional  
824 regionalization of the neuroepithelium during vertebrate neurogenesis. *Int J Dev Biol*, *53*(7), 895-  
825 908. doi:082721ml [pii] 10.1387/ijdb.082721ml
- 826  
827 Le Dreau, G., Saade, M., Gutierrez-Vallejo, I., & Marti, E. (2014). The strength of SMAD1/5 activity  
828 determines the mode of stem cell division in the developing spinal cord. *J Cell Biol*, *204*(4), 591-605.  
829 doi:10.1083/jcb.201307031 jcb.201307031 [pii]
- 830  
831 Lee, G., White, L. S., Hurov, K. E., Stappenbeck, T. S., & Piwnicka-Worms, H. (2009). Response of small  
832 intestinal epithelial cells to acute disruption of cell division through CDC25 deletion. *Proc Natl Acad*  
833 *Sci U S A*, *106*(12), 4701-4706. doi:0900751106 [pii] 10.1073/pnas.0900751106
- 834  
835 Li, S., Mattar, P., Zinyk, D., Singh, K., Chaturvedi, C. P., Kovach, C., . . . Schuurmans, C. (2012). GSK3  
836 temporally regulates neurogenin 2 proneural activity in the neocortex. *J Neurosci*, *32*(23), 7791-  
837 7805. doi:10.1523/jneurosci.1309-12.2012
- 838  
839 Lobjois, V., Benazeraf, B., Bertrand, N., Medevielle, F., & Pituello, F. (2004). Specific regulation of cyclins D1  
840 and D2 by FGF and Shh signaling coordinates cell cycle progression, patterning, and differentiation  
841 during early steps of spinal cord development. *Dev Biol*, *273*(2), 195-209.  
842 doi:10.1016/j.ydbio.2004.05.031 S0012160604004105 [pii]

- 843  
844 Locker, M., Agathocleous, M., Amato, M. A., Parain, K., Harris, W. A., & Perron, M. (2006). Hedgehog  
845 signaling and the retina: insights into the mechanisms controlling the proliferative properties of  
846 neural precursors. *Genes Dev*, *20*(21), 3036-3048. doi:10.1101/gad.391106
- 847  
848 Lukaszewicz, A. I., & Anderson, D. J. (2011). Cyclin D1 promotes neurogenesis in the developing spinal cord  
849 in a cell cycle-independent manner. *Proc Natl Acad Sci U S A*, *108*(28), 11632-11637.  
850 doi:10.1073/pnas.1106230108 1106230108 [pii]
- 851  
852 Ma, Z. Q., Liu, Z., Ngan, E. S., & Tsai, S. Y. (2001). Cdc25B functions as a novel coactivator for the steroid  
853 receptors. *Mol Cell Biol*, *21*(23), 8056-8067. doi:10.1128/mcb.21.23.8056-8067.2001
- 854  
855 Molina, A., & Pituello, F. (2016). Playing with the cell cycle to build the spinal cord. *Dev Biol*.  
856 doi:10.1016/j.ydbio.2016.12.022
- 857  
858 MuhChyi, C., Juliandi, B., Matsuda, T., & Nakashima, K. (2013). Epigenetic regulation of neural stem cell fate  
859 during corticogenesis. *Int J Dev Neurosci*, *31*(6), 424-433. doi:10.1016/j.ijdevneu.2013.02.006
- 860  
861 Murciano, A., Zamora, J., López-Sánchez, J., & Frade, J. M. (2002). Interkinetic nuclear movement may  
862 provide spatial clues to the regulation of neurogenesis. *Mol Cell Neurosci*, *21*(2), 285-300.
- 863  
864 Müller, T., Anlag, K., Wildner, H., Britsch, S., Treier, M., & Birchmeier, C. (2005). The bHLH factor Olig3  
865 coordinates the specification of dorsal neurons in the spinal cord. *Genes Dev*, *19*(6), 733-743.  
866 doi:10.1101/gad.326105
- 867  
868 Olivera-Martinez, I., Schurch, N., Li, R. A., Song, J., Halley, P. A., Das, R. M., . . . Storey, K. G. (2014). Major  
869 transcriptome re-organisation and abrupt changes in signalling, cell cycle and chromatin regulation  
870 at neural differentiation in vivo. *Development*, *141*(16), 3266-3276. doi:10.1242/dev.112623
- 871  
872 Pauklin, S., Madrigal, P., Bertero, A., & Vallier, L. (2016). Initiation of stem cell differentiation involves cell  
873 cycle-dependent regulation of developmental genes by Cyclin D. *Genes Dev*, *30*(4), 421-433.  
874 doi:10.1101/gad.271452.115
- 875  
876 Pauklin, S., & Vallier, L. (2013). The cell-cycle state of stem cells determines cell fate propensity. *Cell*, *155*(1),  
877 135-147. doi:10.1016/j.cell.2013.08.031 S0092-8674(13)01025-8 [pii]
- 878  
879 Peco, E., Escude, T., Agius, E., Sabado, V., Medevielle, F., Ducommun, B., & Pituello, F. (2012). The CDC25B  
880 phosphatase shortens the G2 phase of neural progenitors and promotes efficient neuron  
881 production. *Development*, *139*(6), 1095-1104. doi:dev.068569 [pii] 10.1242/dev.068569
- 882  
883 Pilaz, L. J., Patti, D., Marcy, G., Ollier, E., Pfister, S., Douglas, R. J., . . . Dehay, C. (2009). Forced G1-phase  
884 reduction alters mode of division, neuron number, and laminar phenotype in the cerebral cortex.  
885 *Proc Natl Acad Sci U S A*, *106*(51), 21924-21929. doi:10.1073/pnas.0909894106 0909894106 [pii]
- 886

- 887 Quastler, H., & Sherman, F. G. (1959). Cell population kinetics in the intestinal epithelium of the mouse. *Exp*  
888 *Cell Res*, 17(3), 420-438.
- 889
- 890 Saadaoui, M., Machicoane, M., di Pietro, F., Etoc, F., Echard, A., & Morin, X. (2014). Dlg1 controls planar  
891 spindle orientation in the neuroepithelium through direct interaction with LGN. *J Cell Biol*, 206(6),  
892 707-717. doi:10.1083/jcb.201405060
- 893
- 894 Saade, M., Gonzalez-Gobartt, E., Escalona, R., Usieto, S., & Martí, E. (2017). Shh-mediated centrosomal  
895 recruitment of PKA promotes symmetric proliferative neuroepithelial cell division. *Nat Cell Biol*,  
896 19(5), 493-503. doi:10.1038/ncb3512
- 897
- 898 Saade, M., Gutierrez-Vallejo, I., Le Dreau, G., Rabadan, M. A., Miguez, D. G., Buceta, J., & Marti, E. (2013).  
899 Sonic hedgehog signaling switches the mode of division in the developing nervous system. *Cell Rep*,  
900 4(3), 492-503. doi:10.1016/j.celrep.2013.06.038 S2211-1247(13)00330-6 [pii]
- 901
- 902 Sato, N., Meijer, L., Skaltsounis, L., Greengard, P., & Brivanlou, A. H. (2004). Maintenance of pluripotency in  
903 human and mouse embryonic stem cells through activation of Wnt signaling by a pharmacological  
904 GSK-3-specific inhibitor. *Nat Med*, 10(1), 55-63. doi:10.1038/nm979
- 905
- 906 Schwartz, Y. B., & Pirrotta, V. (2007). Polycomb silencing mechanisms and the management of genomic  
907 programmes. *Nat Rev Genet*, 8(1), 9-22. doi:10.1038/nrg1981
- 908
- 909 Sela, Y., Molotski, N., Golan, S., Itskovitz-Eldor, J., & Soen, Y. (2012). Human embryonic stem cells exhibit  
910 increased propensity to differentiate during the G1 phase prior to phosphorylation of  
911 retinoblastoma protein. *Stem Cells*, 30(6), 1097-1108. doi:10.1002/stem.1078
- 912
- 913 Singh, A. M., Sun, Y., Li, L., Zhang, W., Wu, T., Zhao, S., . . . Dalton, S. (2015). Cell-Cycle Control of Bivalent  
914 Epigenetic Domains Regulates the Exit from Pluripotency. *Stem Cell Reports*, 5(3), 323-336.  
915 doi:10.1016/j.stemcr.2015.07.005
- 916
- 917 Sohn, J., Kristjansdottir, K., Safi, A., Parker, B., Kiburz, B., & Rudolph, J. (2004). Remote hot spots mediate  
918 protein substrate recognition for the Cdc25 phosphatase. *Proc Natl Acad Sci U S A*, 101(47), 16437-  
919 16441. doi:0407663101 [pii] 10.1073/pnas.0407663101
- 920
- 921 Soufi, A., & Dalton, S. (2016). Cycling through developmental decisions: how cell cycle dynamics control  
922 pluripotency, differentiation and reprogramming. *Development*, 143(23), 4301-4311.  
923 doi:10.1242/dev.142075
- 924
- 925 Thomas, Y., Peter, M., Mechali, F., Blanchard, J. M., Coux, O., & Baldin, V. (2014). Kizuna is a novel mitotic  
926 substrate for CDC25B phosphatase. *Cell Cycle*, 13(24), 3867-3877.  
927 doi:10.4161/15384101.2014.972882
- 928
- 929 Tozer, S., Baek, C., Fischer, E., Gojame, R., & Morin, X. (2017). Differential Routing of Mindbomb1 via  
930 Centriolar Satellites Regulates Asymmetric Divisions of Neural Progenitors. *Neuron*, 93(3), 542-  
931 551.e544. doi:10.1016/j.neuron.2016.12.042

- 932  
933 Tronche, F., Kellendonk, C., Kretz, O., Gass, P., Anlag, K., Orban, P. C., . . . Schütz, G. (1999). Disruption of  
934 the glucocorticoid receptor gene in the nervous system results in reduced anxiety. *Nat Genet*, *23*(1),  
935 99-103. doi:10.1038/12703
- 936  
937 Ueno, H., Nakajo, N., Watanabe, M., Isoda, M., & Sagata, N. (2008). FoxM1-driven cell division is required  
938 for neuronal differentiation in early *Xenopus* embryos. *Development*, *135*(11), 2023-2030.  
939 doi:10.1242/dev.019893
- 940  
941 Vilas-Boas, F., Fior, R., Swedlow, J. R., Storey, K. G., & Henrique, D. (2011). A novel reporter of notch  
942 signalling indicates regulated and random Notch activation during vertebrate neurogenesis. *BMC*  
943 *Biol*, *9*, 58. doi:1741-7007-9-58 [pii] 10.1186/1741-7007-9-58
- 944  
945 Wilcock, A. C., Swedlow, J. R., & Storey, K. G. (2007). Mitotic spindle orientation distinguishes stem cell and  
946 terminal modes of neuron production in the early spinal cord. *Development*, *134*(10), 1943-1954.  
947 doi:134/10/1943 [pii] 10.1242/dev.002519
- 948  
949 Zhao, B. M., Keasey, S. L., Tropea, J. E., Lountos, G. T., Dyas, B. K., Cherry, S., . . . Ulrich, R. G. (2015).  
950 Phosphotyrosine Substrate Sequence Motifs for Dual Specificity Phosphatases. *PLoS One*, *10*(8),  
951 e0134984. doi:10.1371/journal.pone.0134984
- 952  
953

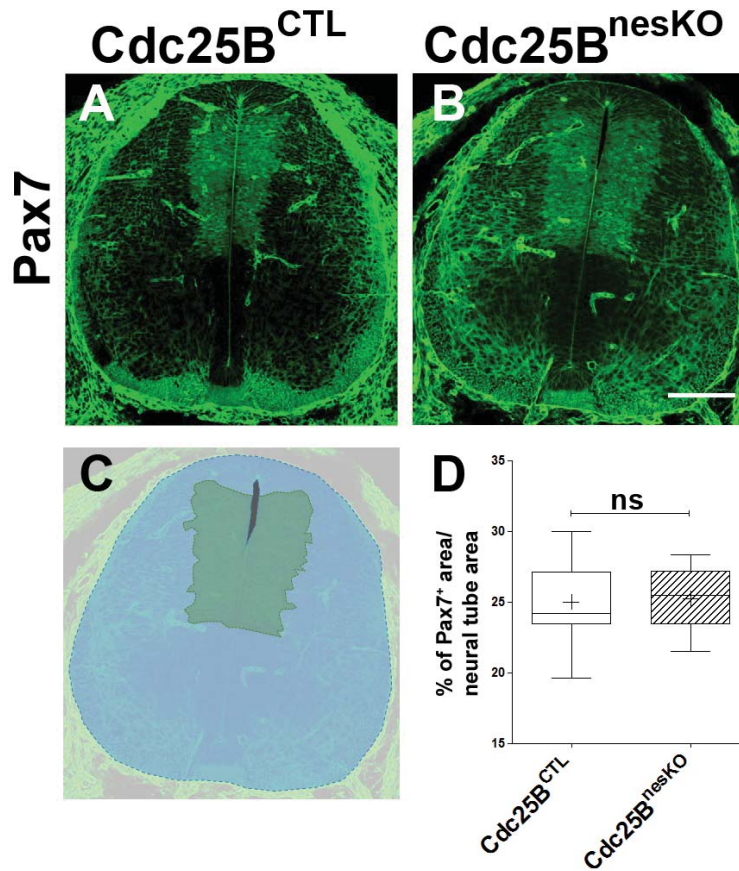

**Figure Supplement 1. Cdc25B conditional genetic loss-of-function does not reduce the progenitor pool. A-B:** Cross-sections of E12.5 embryo neural tubes in control (A) and conditional KO conditions (B). **C:** The progenitor pool size is evaluated by the percentage of the Pax7 progenitor area (green) compared to the neural tube area (blue). **D:** Box and whiskers plots comparing the progenitor area in a global analysis of E11.5 - E12.5 control (19 embryos) and nesKO (13 embryos) neural tubes. The cross indicates the mean value. Scale bar represents 100  $\mu$ m



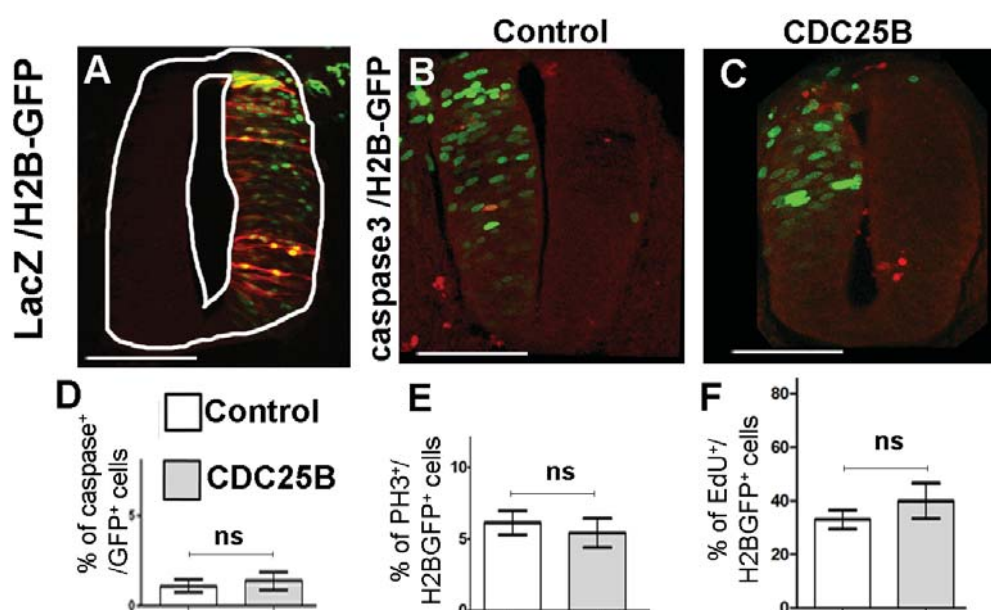

**Figure Supplement 2. CDC25B gain-of-function does not increase apoptosis, S or M cell cycle lengths.** **A:** Section of embryonic spinal cord at HH17 after co-electroporation of and pCAG::H2B-GFP and anti lacZ immunostaining in red. Note that the ccRE promoter leads to lacZ positive cells localized throughout the dorso-ventral axis of the neural tube. **B-C:** Anti active Caspase-3 immunostaining (red) 24 hours after co-electroporation of pCAG::H2B-GFP plus pccRE::lacZ (control) (B) or pccRE::CDC25B vector (C). Scale bars represent 100  $\mu$ m. **D:** Percentage of active-Caspase 3<sup>+</sup> cells in the H2B-GFP<sup>+</sup> population after 24 hours: control (1.1 +/- 0.84%) and CDC25B gain-of-function (1.39 +/- 0.5%). Mean +/- sem from 3 experiments, 7 control embryos corresponding to 1194 cells, and 9 embryos corresponding to 569 cells for CDC25B gain-of-function. **E:** Mitotic index, represented as the percentage of PH3<sup>+</sup> cells among H2B-GFP<sup>+</sup> electroporated cells after 24 hours: control (6.1 +/- 0.34%) and CDC25B gain-of-function (5.4 +/- 1%). Mean +/- SEM from 3 different experiments, 8 embryos and 930 cells for the control, and 10 embryos and 868 cells for CDC25B gain-of-function. **F:** Proliferative index represented as the percentage of EdU<sup>+</sup> cells in the H2B-GFP<sup>+</sup> population after 24 hours: control (33 +/- 3.5%) and CDC25B gain-of-function (40 +/- 6.6%). Mean +/- SEM from 3 experiments, 9 embryos for the control, and 7 embryos for CDC25B gain-of-function.

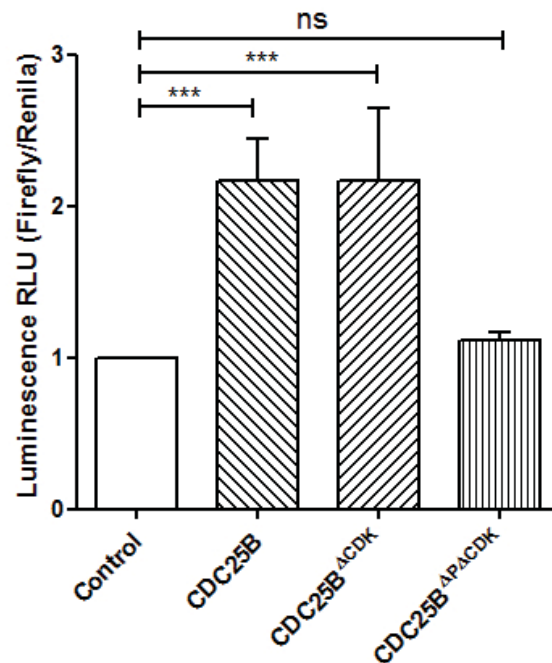

**Figure Supplement 3. Effects of various CDC25B constructs on NeuroD promoter activity.** Column bar graph representing the transcriptional activity of the NeuroD promoter assessed *in vivo* following electroporation of the indicated CDC25B constructs. At HH11 the embryos were electroporated with the pNeuroD::Luc vector and a renilla luciferase reporter construct carrying the cytomegalovirus immediate early enhancer promoter for normalization (Promega), together with the indicated DNAs. At HH22, 48 hours post electroporation, the neural tubes were dissected and processed following the Dual Luciferase Reporter Assay System protocol (Promega). The data are presented as the means  $\pm$  SEM from at least 14 embryos in 4 experiments.

# Supplemental Information Text 1<sup>1</sup> — Modeling the dynamics.

Azais Manon, Gautrais Jacques\*

\* [jacques.gautrais@univ-tlse3.fr](mailto:jacques.gautrais@univ-tlse3.fr)

## Abstract

We present the model of the dynamics for the interpretation of CDC25B experiments.

We present the solution when fate parameters are considered steady over the time window of the analyses.

We present the sensitivity of the dynamics to the modes of division.

We present and explain the predicted fractions of neurons under the three conditions and the two zones.

---

<sup>1</sup>for the paper: NEUROGENIC DECISIONS REQUIRE A CELL CYCLE INDEPENDENT FUNCTION OF THE CDC25B PHOSPHATASE, Frédéric BONNET, Mélanie ROUS-SAT, Angie MOLINA, Manon AZAIS, Sophie BEL-VIALAR, Jacques GAUTRAIS, Fabienne PITUELLO and Eric AGIUS.

## 1 **1 The model**

2 We consider a population of cells  $C(t)$  at time  $t$ , part of which are proliferating  
3 progenitors  $P(t)$ , part of which are differentiated neurons  $N(t)$ , with

$$C(t) = P(t) + N(t) \quad (1)$$

4 The dividing progenitors can undergo three kinds of fate, yielding:

- 5 • some proliferative divisions ending with two progenitors (pp-divisions)
- 6 • some asymmetric divisions ending with one progenitor and one neuron  
7 (pn-divisions)
- 8 • some terminal divisions ending with two neurons (nn-divisions)

9 We consider that the division of a cell in two cells is instantaneous (it is  
10 always possible to find a date before which there is one cell, and after which  
11 there are two cells).

12 We also consider that division events occur uniformly in time (asynchronously).

13 Let us denote :

14  $\eta$  the rate at which P-cells undergo divisions (in fraction of the P-pool per unit  
15 time)

16  $\alpha_{pp}(t)$  the fraction of dividing cells undergoing pp-divisions

17  $\alpha_{pn}(t)$  the fraction of dividing cells undergoing pn-divisions

18  $\alpha_{nn}(t)$  the fraction of dividing cells undergoing nn-divisions

19  $P(0), N(0)$  the quantity of P-cells and N-cells known at time  $t = 0$ .

20 In general, the fractions of pp-, pn- and nn-divisions can evolve with time,  
21 under the constraint that  $\alpha_{pp} + \alpha_{pn} + \alpha_{nn} = 1$ , and so might as well the division  
22 rate.

23 The time change  $\dot{P}(t)$  of pool  $P(t)$  (resp.  $\dot{N}(t)$ ) is then driven at time  $t$  by:

$$\begin{cases} \frac{dP}{dt} = \dot{P}(t) = -\eta P(t) + 2\alpha_{pp}(t)\eta P(t) + 1\alpha_{pn}(t)\eta P(t) \\ \frac{dN}{dt} = \dot{N}(t) = +2\alpha_{nn}(t)\eta P(t) + 1\alpha_{pn}(t)\eta P(t) \end{cases} \quad (2)$$

24 where in the first equation :

- 25 •  $-\eta P(t)$  quantifies the rate at which P-cells disappear from the pool  $P(t)$   
26 because they divide. The quantity of disappearing P-cells between  $t$  and  
27  $t + dt$  is then  $\eta P(t)dt$ .
- 28 •  $\alpha_{pp}\eta P(t)$  quantifies the fraction of this quantity that undergoes a pp-  
29 division ; it doubles to yield 2 P and adds up to the pool  $P(t)$  (hence the  
30 factor 2)
- 31 •  $\alpha_{pn}\eta P(t)$  quantifies the fraction of this quantity that undergoes a pn-  
32 division ; it doubles to yield 1 P and 1 N, so only half (the P part) adds  
33 up to the pool  $P(t)$  (hence the factor 1)

34 correspondingly in the second equation :

- 35 •  $\alpha_{nn}\eta P(t)$  quantifies the fraction of this quantity that undergoes a nn-  
36 division ; it doubles to yield 2 N and adds up to the pool  $N(t)$  (hence the  
37 factor 2)
- 38 •  $\alpha_{pn}\eta P(t)$  is the fraction of this quantity that undergoes a pn-division ; it  
39 doubles to yield 1 P and 1 N and only half (the N part) adds up to the  
40 pool  $N(t)$  (hence the factor 1)

## 41 2 Solutions with unvarying parameters

42 Considering a period of time during which the fractions of pp-, pn- and nn-  
43 divisions do not evolve with time, the dynamics can be written:

$$\begin{cases} \dot{P}(t) &= -\eta P(t) + 2\alpha_{pp}\eta P(t) + 1\alpha_{pn}\eta P(t) \\ \dot{N}(t) &= +2\alpha_{nn}\eta P(t) + 1\alpha_{pn}\eta P(t) \end{cases} \quad (3)$$

$$\begin{cases} \dot{P}(t) &= (-1 + 2\alpha_{pp} + \alpha_{pn}) \eta P(t) \\ \dot{N}(t) &= (\alpha_{pn} + 2\alpha_{nn}) \eta P(t) \end{cases} \quad (4)$$

44 Let  $\gamma = -1 + 2\alpha_{pp} + \alpha_{pn}$ .

45 Considering that  $\alpha_{pp} + \alpha_{pn} + \alpha_{nn} = 1$ , we have:

$$\begin{aligned} \alpha_{pn} + 2\alpha_{nn} &= \alpha_{pn} + 2(1 - \alpha_{pp} - \alpha_{pn}) \\ &= \alpha_{pn} + 2 - 2\alpha_{pp} - 2\alpha_{pn} \\ &= 1 - (-1 + 2\alpha_{pp} + \alpha_{pn}) \\ &= 1 - \gamma \end{aligned} \quad (5)$$

46 Hence,

$$\begin{cases} \dot{P}(t) &= \gamma \eta P(t) \\ \dot{N}(t) &= (1 - \gamma) \eta P(t) \end{cases} \quad (6)$$

47 and the solutions are of the general form:

$$\begin{cases} P(t) &= P(0)e^{\gamma\eta t} \\ N(t) &= N(0) + \int_0^t (1 - \gamma) \eta P(u) du \end{cases} \quad (7)$$

48 plugging the first into the second, we have:

$$\begin{cases} P(t) &= P(0)e^{\gamma\eta t} \\ N(t) &= N(0) + (1 - \gamma) \eta P(0) \int_0^t e^{\gamma\eta u} du \end{cases} \quad (8)$$



## 49 2.1 Explicit solutions

50 For explicit solutions, we have to consider two cases:  $\gamma = 0$  and  $\gamma \neq 0$ .

For  $\gamma = 0$ , we have:

$$\begin{cases} P(t) = P(0) \times 1 \\ N(t) = N(0) + \eta P(0) \int_0^t 1 du \end{cases}$$

51 so that:

$$\begin{cases} P(t) = P(0) \\ N(t) = N(0) + \eta P(0)t \end{cases} \quad (9)$$

52 In that case, the pool of progenitors is steady, and the pool of neurons  
53 increases linearly with time.

54

55 For  $\gamma \neq 0$ , solving the integral in the second equation yields:

$$\begin{cases} P(t) = P(0)e^{\gamma t} \\ N(t) = N(0) + (1 - \gamma)\eta P(0) \left( \frac{1}{\eta\gamma} (e^{\eta\gamma t} - e^{\eta\gamma 0}) \right) \end{cases} \quad (10)$$

56 so that:

$$\begin{cases} P(t) = P(0)e^{\gamma t} \\ N(t) = N(0) + P(0)\frac{1-\gamma}{\gamma}(e^{\eta\gamma t} - 1) \end{cases} \quad (11)$$

57 In that case, the evolution of the system depends on the sign of  $\gamma$ .

## 58 2.2 Meaning of $\gamma$

59 We note that, for a given mitosis rate  $\eta$ , the dynamics only depend upon  $\gamma$ .

60 We have  $\gamma = 2\alpha_{pp} + \alpha_{pn} - 1 = 2\alpha_{pp} + \alpha_{pn} - (\alpha_{pp} + \alpha_{pn} + \alpha_{nn}) = \alpha_{pp} - \alpha_{nn}$ .

61 The case  $\gamma = 0$  (Eq.9) corresponds to  $\alpha_{pp} = \alpha_{nn}$ . Here, the P-pool is steady  
 62 and can be considered as a source of N-cells emitted at the steady rate  $\eta P(0)$   
 63 (N-cells per unit time):

$$N(t) = N(0) + \eta P(0)t \quad (\text{for } \alpha_{pp} = \alpha_{nn}) \quad (12)$$

64

65 The case  $\alpha_{pp} > \alpha_{nn}$  yields  $\gamma > 0$ , so that the P-pool will increase with  
 66 time. At the extreme, a purely proliferative P-pool corresponds to  $\alpha_{pp} = 1$  and  
 67  $\alpha_{nn} = 0$ , hence  $\gamma = 1$ . In that case, the dynamics simplify to the classical  
 68 proliferative equation for the P-pool, while the N-pool remains unchanged:

$$\begin{cases} P(t) = P(0)e^{\eta t} \\ N(t) = N(0) \end{cases} \quad (\text{for } \alpha_{pp} = 1, \alpha_{nn} = 0) \quad (13)$$

69

70 The case  $\alpha_{pp} < \alpha_{nn}$  yields  $\gamma < 0$ , so that the P-pool will decrease with  
 71 time. At the extreme, a fully differentiating P-pool corresponds to  $\alpha_{pp} = 0$   
 72 and  $\alpha_{nn} = 1$ , hence  $\gamma = -1$ . In that case, the P-pool undergoes a classical  
 73 exponential decay, and the N-pool increases in proportion of the remaining P-  
 74 pool, up to  $2P(0)$ :

$$\begin{cases} P(t) = P(0)e^{-\eta t} \\ N(t) = N(0) + P(0)(-2)(e^{-\eta t} - 1) \\ \quad = N(0) + 2P(0)(1 - e^{-\eta t}) \end{cases} \quad (\text{for } \alpha_{pp} = 0, \alpha_{nn} = 1) \quad (14)$$

75       Regarding the total population  $C(t) = P(t) + N(t)$  (fig. 1), positive (or null)  
76 value of  $\gamma$  ( $\alpha_{pp} \geq \alpha_{nn}$ ) allows an infinite growth of the total population  $C(t)$   
77 whereas the growth saturates as soon as  $\gamma < 0$  ( $\alpha_{pp} < \alpha_{nn}$ ). We note here that  
78 we made the hypothesis that the fate parameters were considered as steady over  
79 time, so interpretations for the real biological system should take into account  
80 that these fate parameters actually change over longer time in the real system.  
81       Regarding the fraction of neurons in the population,  $N(t)/C(t)$  (fig. 2), it  
82 increases as soon as  $\gamma < 1$ , yet at a rate depending on  $\gamma$ .

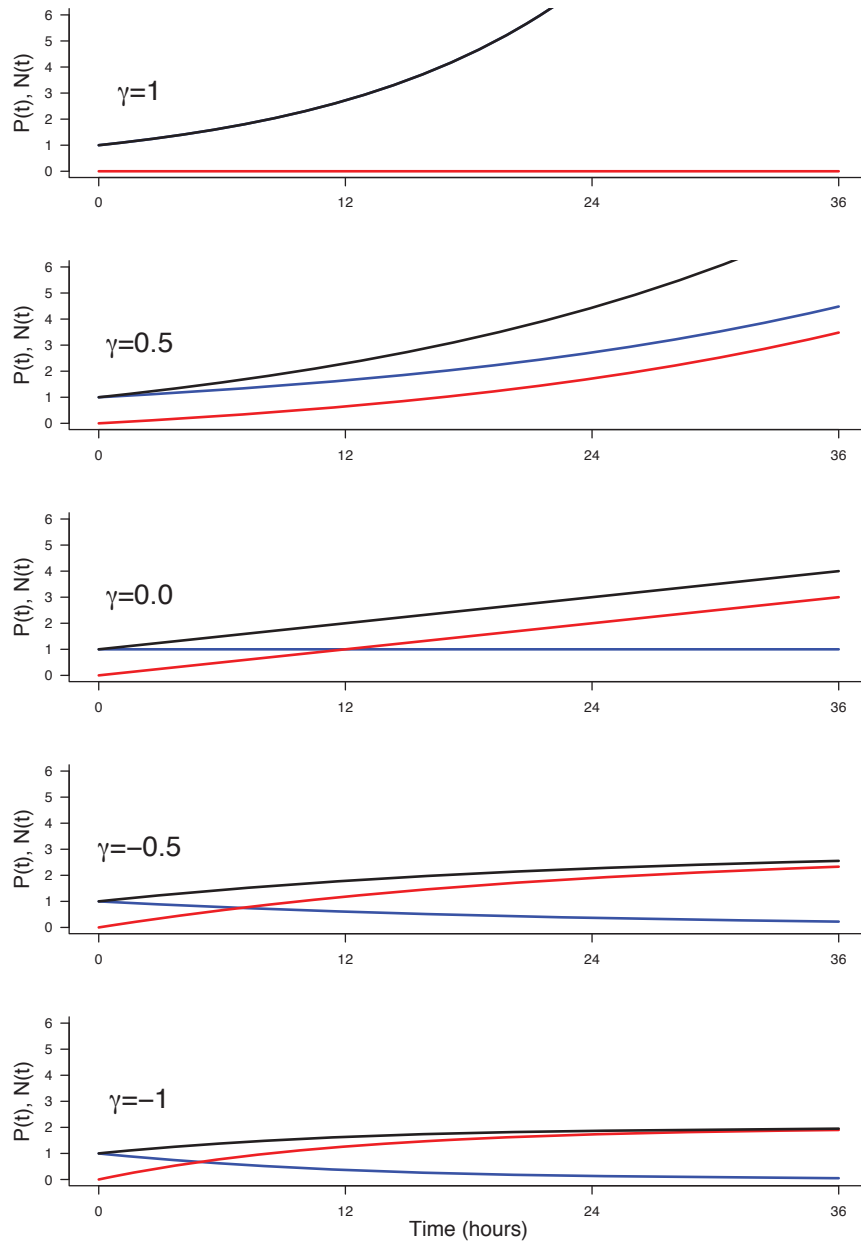

Figure 1: **Effect of  $\gamma$  on the evolution of  $P(t)$  (blue),  $N(t)$  (red) and  $C(t) = P(t) + N(t)$  (black).** Parameters used:  $P(0) = 1$ ,  $N(0) = 0$ ,  $\eta = 1/12$ , corresponding to a cycle time of 12 hours.

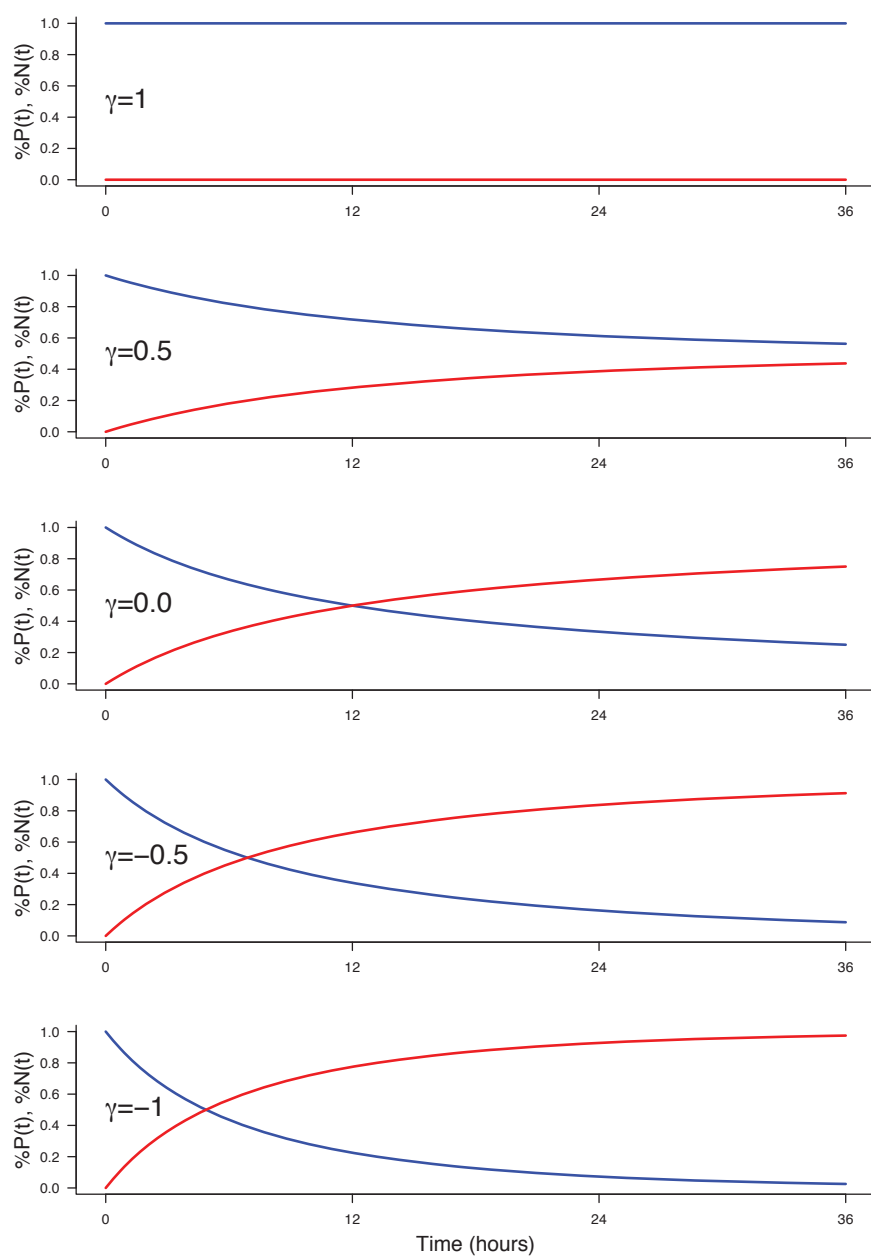

Figure 2: **Effect of  $\gamma$  on the evolution of the fractions  $P(t)/C(t)$  (blue) and  $N(t)/C(t)$  (red).**

### 83 **3 Interpretations at the individual cell scale**

84 We have so far describe the system at the population scale. At the individual  
85 scale, two different kinds of process (at least) would result in the same dynamics  
86 at the population scale described in Eq.2.

#### 87 **3.1 Probabilistic fates, with a common deterministic di-** 88 **vision rate**

89 The most immediate interpretation is to consider that all cells undergo mitosis at  
90 the same rate, and that the fate of any mitosis is stochastic and probabilistically  
91 distributed according to  $(\alpha_{pp}, \alpha_{pn}, \alpha_{nn})$ . In that case, only the rate  $\eta$  (used in  
92 the equations at the population scale) has to be determined from cell-scale  
93 model, since it depends upon the characteristic time  $\tau_m$  between two mitosis at  
94 the cell scale.

95 Let us consider the hypothesis that mitosis happen exactly every  $\tau_m$  for all  
96 cells (common deterministic division time), still asynchronously so that division  
97 dates are uniformly distributed over time (this is the most common hypothesis  
98 in the community). We want to express  $\eta$  as a function of  $\tau_m$ .

99 For the sake of simplicity, let us consider the pure proliferative process ( $\alpha_{pp} =$   
100 1) so that we deal with only one population  $P(t)$ .

101 Let us start at time 0 with an initial pool  $P_1(0)$  containing a very large  
102 number of cells (so that  $P_1(t)$  can be considered as continuous). Since mitosis  
103 take a fixed time  $\tau_m$ , their last division occurred before  $t = 0$ , the oldest division  
104 happened at  $0 - \tau_m$  and they all will make a mitosis in  $[0 .. 0 + \tau_m]$ . Since divisions  
105 are uniformly distributed over time, the number doing a mitosis during a small  
106 time interval  $\Delta t$  is proportional to  $\Delta t / \tau_m$  and  $P(0)$ . Hence, the loss in  $P_1$   
107 between  $t$  and  $t + \Delta t$  is given by:



$$P_1(t + \Delta t) - P_1(t) = -P_1(0)\Delta t/\tau_m \quad (15)$$

$$\frac{P_1(t + \Delta t) - P_1(t)}{\Delta t} = -P_1(0)/\tau_m \quad (16)$$

108 Taking the limit  $\Delta t \rightarrow 0$  yields:

$$\dot{P}(t) = \frac{dP_1(t)}{dt} = -P_1(0)/\tau_m \quad (17)$$

109 Considering  $P_1(0)$ , we then have:

$$\begin{aligned} P_1(t) &= P_1(0) - (P_1(0)/\tau_m) t \\ &= P_1(0)(1 - t/\tau_m) \end{aligned} \quad (18)$$

110 Logically,  $P_1(t)$  decreases linearly from  $P_1(0)$  down to 0 at time  $t = \tau_m$ .  
111 Meanwhile, the output of each division will populate the next generation, say  
112  $P_2(t)$ , at twice the rate  $P_1$  disappears, up to  $2P_1(0)$  at time  $t = \tau_m$ , from which  
113  $P_2$  will start decreasing doing mitosis and populate the third generation  $P_3$  and  
114 so on... Such a process would then translate into a population growth which is  
115 piecewise linear (fig 3), but very close to an exponential growth. If we equate  
116 at time  $\tau_m$  the piecewise growth, and its exponential approximation at rate  $\eta$ ,  
117 we have:

$$e^{\eta\tau_m} = P_2(\tau_m) = 2 \implies \eta = \ln 2/\tau_m \quad (19)$$

118 Denoting  $\tau_c = 1/\eta$  the characteristic time at the population scale, we then  
119 have:  $\tau_c = \tau_m/\ln 2$ . Hence, from an observed time  $\tau_c$  at the population scale,  
120 we should infer (under this model) that  $\tau_m = \tau_c \ln 2$ , i.e.  $\tau_m \simeq 0.7\tau_c$  (e.g. if  
121 population cycle time is 12h, cell cycle time should be around 8h20).

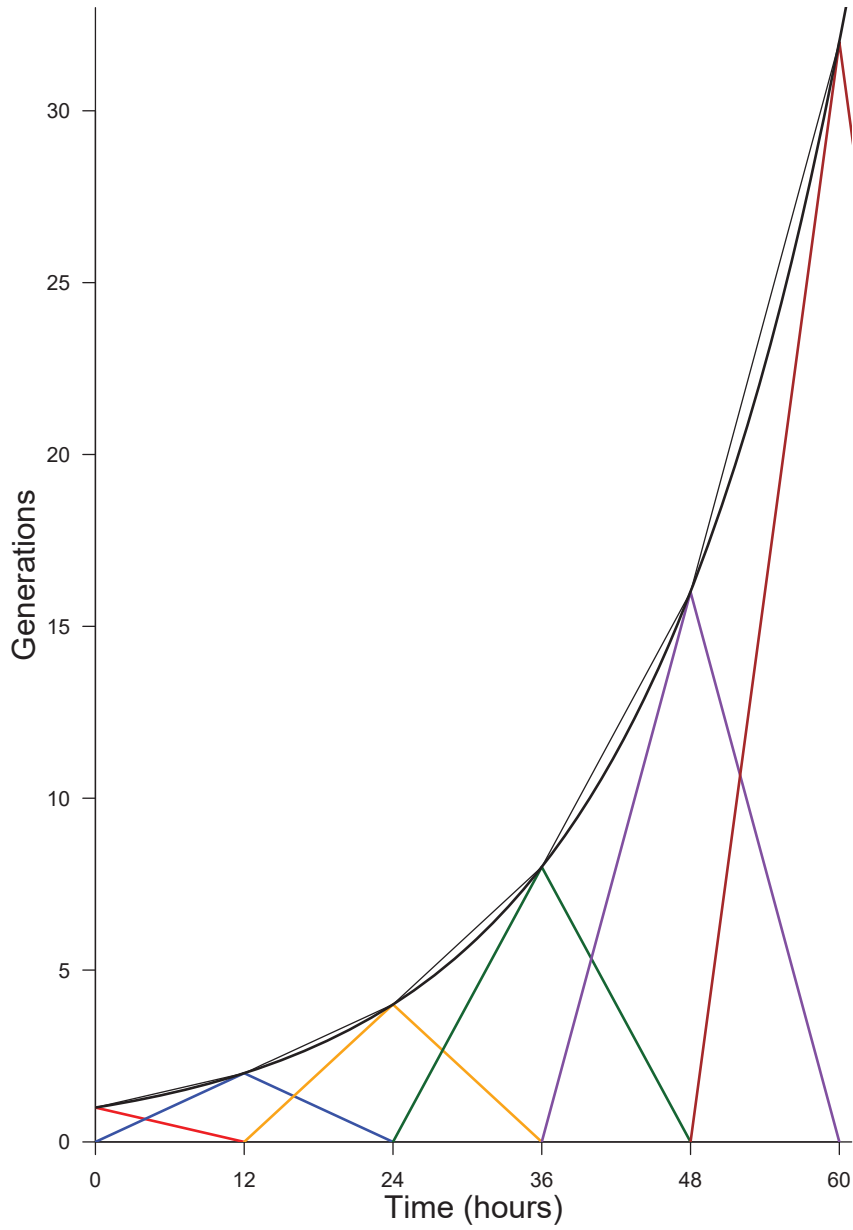

Figure 3: **Generations produced by an initial pool  $P_1(0) = 1$** , under the hypothesis of a common deterministic division time  $\tau_m = 12$  h. Each generation is reported by a color. The thin black curve indicates the total pool present at time  $t$  (adding the two generations). The thick black curve reports the continuous approximation  $\exp(\ln 2 t / \tau_m)$  (eq. 19)

### 122 3.2 Deterministic fates, with specific division rates

123 Another way to produce the dynamics described in eq.2 at the population scale  
124 is to consider that each kind of fate result from a specific division time. In such  
125 a picture, the time needed to achieve a cycle deterministically determines the  
126 kind of fate.

127 To exhibit this interpretation, we rewrite eq.2 as follows:

$$\begin{cases} \dot{P}(t) &= -\eta(\alpha_{pp} + \alpha_{pn} + \alpha_{nn})P(t) + 2\alpha_{pp}\eta P(t) + 1\alpha_{pn}\eta P(t) \\ \dot{N}(t) &= 1\alpha_{pn}\eta P(t) + 2\alpha_{nn}\eta P(t) \end{cases} \quad (20)$$

128 Denoting  $\eta_{pp} = \alpha_{pp}\eta$  (and correspondingly for  $\eta_{pn}$  and  $\eta_{nn}$ ), we then have:

$$\begin{cases} \dot{P}(t) &= -(\eta_{pp} + \eta_{pn} + \eta_{nn})P(t) + 2\eta_{pp}P(t) + 1\eta_{pn}P(t) \\ \dot{N}(t) &= 1\eta_{pn}P(t) + 2\eta_{nn}P(t) \end{cases} \quad (21)$$

129 The interpretation is then that, from the pool  $P(t)$ , the cells leaving it at  
130 rate  $\eta_{pp}$  yield pp-divisions, those leaving it at rate  $\eta_{pn}$  yield pn-divisions, and  
131 the others, leaving it at rate  $\eta_{nn}$ , yield nn-divisions. Overall, the pool  $P(t)$   
132 depletes at the sum rate  $\eta = \eta_{pp} + \eta_{pn} + \eta_{nn}$ .

133 Correspondingly, the population cycle time  $\tau_c = 1/\eta$  would then be given  
134 by:

$$\frac{1}{\tau_c} = \frac{1}{\tau_{pp}} + \frac{1}{\tau_{pn}} + \frac{1}{\tau_{nn}} \quad (22)$$

135 equivalently by:

$$\tau_c = \frac{\tau_{pp}\tau_{pn}\tau_{nn}}{\tau_{pn}\tau_{nn} + \tau_{pp}\tau_{nn} + \tau_{pp}\tau_{pn}} \quad (23)$$

136 We also note that the distribution of fates is then completely constrained  
137 by the  $\tau_{pp}, \tau_{pn}, \tau_{nn}$  (under the constraint that mitosis events are uniformly dis-  
138 tributed in time). Indeed, it remains true that the quantity leaving the P-pool  
139 during  $\Delta t$  to make pp-divisions is proportional to  $\Delta t/\tau_{pp}$  (corr. for other fates).  
140 This implies in turn that the fraction  $\alpha_{pp}$  leaving for an pp-division is  $\tau_c/\tau_{pp}$ ,  
141 correspondingly,  $\alpha_{pn} = \tau_c/\tau_{pn}$  and  $\alpha_{nn} = \tau_c/\tau_{nn}$ .

142 As a consequence, if we have experimental measures of  $\tau_c$  and of a distribu-  
143 tion among fates  $\alpha_{pp}, \alpha_{pn}, \alpha_{nn}$ , we must conclude that:

$$\tau_{pp} = \frac{\tau_c}{\alpha_{pp}}, \tau_{pn} = \frac{\tau_c}{\alpha_{pn}}, \tau_{nn} = \frac{\tau_c}{\alpha_{nn}} \quad (24)$$

144 For  $\tau_c = 12 h$ , and a distribution (0.6, 0.3, 0.1), we would obtain:

$$\tau_{pp} = 20 h, \tau_{pn} = 40 h, \tau_{nn} = 120 h \quad (25)$$

145 The main point is then: if the ratios between fractions of fate  $\alpha_{pp}, \alpha_{pn}, \alpha_{nn}$   
146 resulted only from differences in rates  $\eta_{pp}, \eta_{pn}, \eta_{nn}$ , the ratios between rates  
147 must be the same as the ratios between fractions:

$$\frac{\eta_{pp}}{\eta_{nn}} = \frac{\alpha_{pp}}{\alpha_{nn}}; \frac{\eta_{pp}}{\eta_{pn}} = \frac{\alpha_{pp}}{\alpha_{pn}}; \frac{\eta_{pn}}{\eta_{nn}} = \frac{\alpha_{pn}}{\alpha_{nn}} \quad (26)$$

148 With  $\alpha_{pp} = 0.6$ ,  $\alpha_{nn} = 0.1$ , we would have  $\tau_{nn} = (\alpha_{pp}/\alpha_{nn})\tau_{pp} = 6 \tau_{pp}$ .

149 If we exclude the possibility that a nn-division is 6 times as long as a pp-  
150 division, then the distribution of fates can not be exclusively determined by  
151 differences in fate-based cycle times. It does not exclude that a given kind of  
152 fate (e.g. proliferative divisions pp) would require a longer time to be achieved  
153 than others, it excludes that such differences would suffice *per se* to explain the  
154 differences between the fractions of fates.

## 155 4 Model predictions using (noisy) data

156 We obtain experimental measures upon this system at different times after elec-  
157 troporation (time 0h): the fractions  $f_N(24)$  of neurons at 24h and  $f_N(48)$  at 48h  
158 (the fraction among the electroporated cells), the distribution of fates at 24h as  
159 well as an estimate of  $\tau_c = 12$  hours. We make the hypothesis that the fate  
160 distribution is steady between 24h and 48h after electroporation, i.e. the 24  
161 hours between the quantification of the mode of division and progenitors and  
162 neurons counting. We use the model to check the consistency of these data with  
163 the model.

### 164 4.1 Knowing the fractions of neurons at 24h and 48h, con- 165 fidence intervals upon the fate distribution

166 The first test of consistency was to determine the ranges of distribution of fates  
167 which was able to explain the transition from  $f_N(24)$  to  $f_N(48)$ .

168 If we had a system with only symmetric divisions (e.g. some value for  $\alpha_{pp}$ ,  
169  $\alpha_{nn} = 1 - \alpha_{pp}$ , with  $\alpha_{pn} = 0$ ), we first ensured that one pair ( $f_N(24), f_N(48)$ )  
170 would be compatible with only one fate distribution.

171 Considering  $P(24) + N(24) = 1$  arbitrary total amount of cells at 24h, we  
172 can plug  $N(24) = f_N(24)$  and  $P(24) = 1 - f_N(24)$  into eq.11 and get:

$$\begin{cases} P(48) &= (1 - f_N(24))e^{24\gamma\eta} \\ N(48) &= f_N(24) + (1 - f_N(24))\frac{1-\gamma}{\gamma}(e^{24\eta\gamma} - 1) \end{cases} \quad (27)$$

173 where  $P(48), N(48)$  correspond to the amount obtained at 48h from this  
174 arbitrary amount of 1 at 24h. We have  $f_N(48) = N(48)/(N(48) + P(48))$ ,  
175 yielding :

$$f_N(48) = \frac{\left[ f_N(24) + (1 - f_N(24)) \frac{1-\gamma}{\gamma} (e^{24\eta\gamma} - 1) \right]}{\left[ f_N(24) + (1 - f_N(24)) \frac{1-\gamma}{\gamma} (e^{24\eta\gamma} - 1) \right] + [(1 - f_N(24)) e^{24\gamma\eta}]}$$
 (28)

<sup>176</sup> which holds for any initial cell amount (fig. 4).

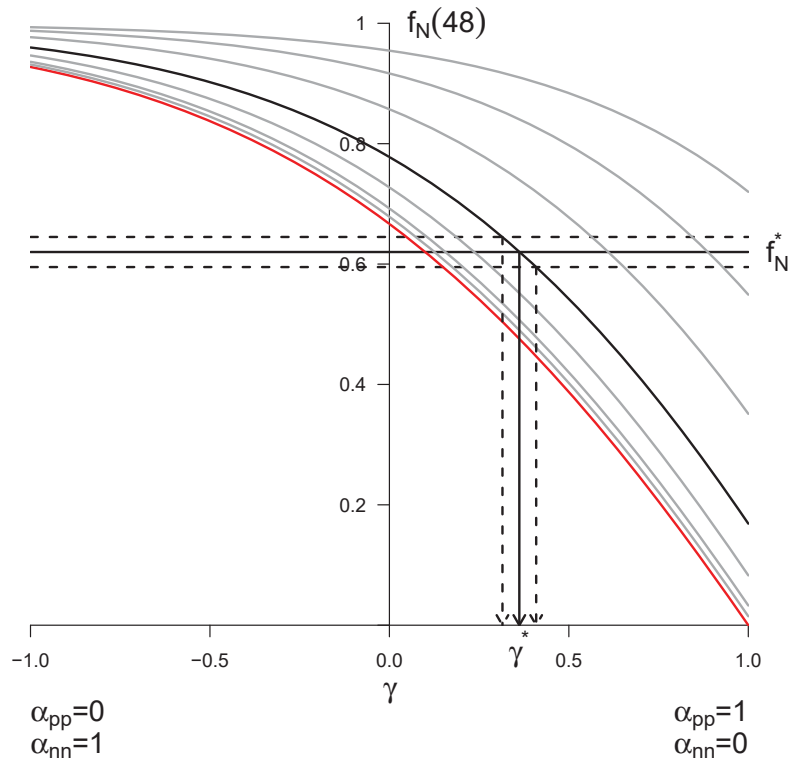

Figure 4: **Predicted  $f_N(48)$  from  $f_N(24)$  for every distribution of symmetric division.** The different curves correspond to different starting values  $f_N(24)$  taken in  $(0.0, 0.1, 0.2, 0.4, 0.6, 0.8, 0.9, 0.95)$ . The bold line corresponds to  $f_N(24) = 0.6$ , the red line to  $f_N(24) = 0.0$ . Each curve reports the predicted value for  $f_N(48)$  starting from the corresponding  $f_N(24)$ , and for all possible distributions of fates given by  $\gamma = \alpha_{pp} - \alpha_{nn}$  (x-axis). Each combined  $(f_N(24), \gamma)$  yields only one predicted  $f_N(48)$ . Conversely, experimental values for the pair  $(f_N(24), f_N(48))$  allow to retrieve the corresponding  $\gamma$  theoretical value. As an example, the value corresponding to the arbitrary value  $f_N^* = 0.62$  was retrieved numerically using Eq.28. We found  $\gamma^* = 0.362$ , yielding  $\alpha_{pp} = 0.681$  and  $\alpha_{nn} = 0.319$ . Confidence interval upon the distributions of fates can also be drawn using the experimental noise about  $f_N(48)$ , as illustrated here considering  $f_N^* \pm 2.5\%$ .



177 Now considering the full system with the three kinds of division, there is more  
178 than a unique triplet  $(\alpha_{pp}, \alpha_{pn}, \alpha_{nn})$  that are compatible with the unique value  
179 of observed  $(f_N(24), f_N(48))$ . For instance, less nn-divisions can be compensated  
180 for by more pn-divisions, yielding the same  $f_N(48)$ .

181 We used the model in the same spirit as in fig.4 to compute the predicted  
182 values for  $f_N(48)$  for all possible fate triplets. For the system with symmetric-  
183 only divisions above, the space of parameters for division is one-dimensional:  $\gamma$   
184 corresponds to one value of  $\alpha_{pp}$ , which constrains in turn the value of  $\alpha_{nn}$ . With  
185 the three kinds of division, this space of parameters becomes two-dimensional:  
186 we need to fix  $\alpha_{pp}$  and  $\alpha_{nn}$ , and  $\alpha_{pn}$  is then constrained. Hence the predictions  
187 should be drawn over a two-dimensional map.

188 We compute those maps for each experimental condition, starting from the  
189 corresponding observed value  $f_N(24)$  (fixing the observed initial condition cor-  
190 responds here to draw only the bold curve in fig.4). Then, we determine nu-  
191 merically the subset of fate triplets compatible with the  $f_N(48) = f_N^*$  measured  
192 in the condition. We also determined numerically the confidence regions for the  
193 distributions of fates that can yield  $f_N^* \pm 2.5\%$ ,  $f_N^* \pm 5\%$  and  $f_N^* \pm 10\%$ .

194 In the end, we also report the distribution of fates that was actually mea-  
195 sured, and check in which confidence interval it is.

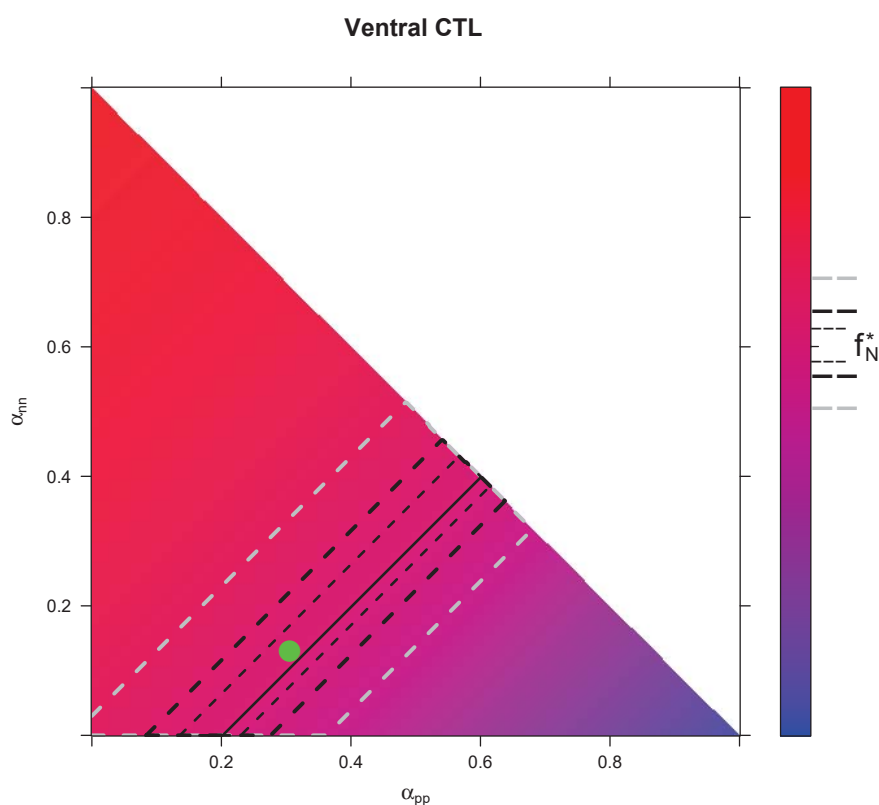

Figure 5: **Predicted  $f_N(48)$  from  $f_N(24)$  for every distribution of fates for control condition in Ventral area.** The color scale indicates  $f_N(48)$ . It is computed from the model, starting from the experimental value of  $f_N(24)$  in the prevailing condition, and using all possible distributions of fates  $\alpha_{pp}$  (x-axis),  $\alpha_{nn}$  (y-axis) and  $\alpha_{pn} = 1 - \alpha_{pn} - \alpha_{nn}$ . The upper side of the triangle corresponds to  $\alpha_{pn} = 0$ . Confidence interval upon the predicted distributions of fates are drawn for the experimental value  $f_N(48) = f_N^*$ . Plain line: all distributions of fates giving exactly  $f_N^*$ . Region delimited by thin dotted line: all distributions of fates compatible with  $f_N^* \pm 2.5\%$ , thick dotted line :  $f_N^* \pm 5\%$ , gray dotted line:  $f_N^* \pm 10\%$ . Green dot: observed distribution of fates.

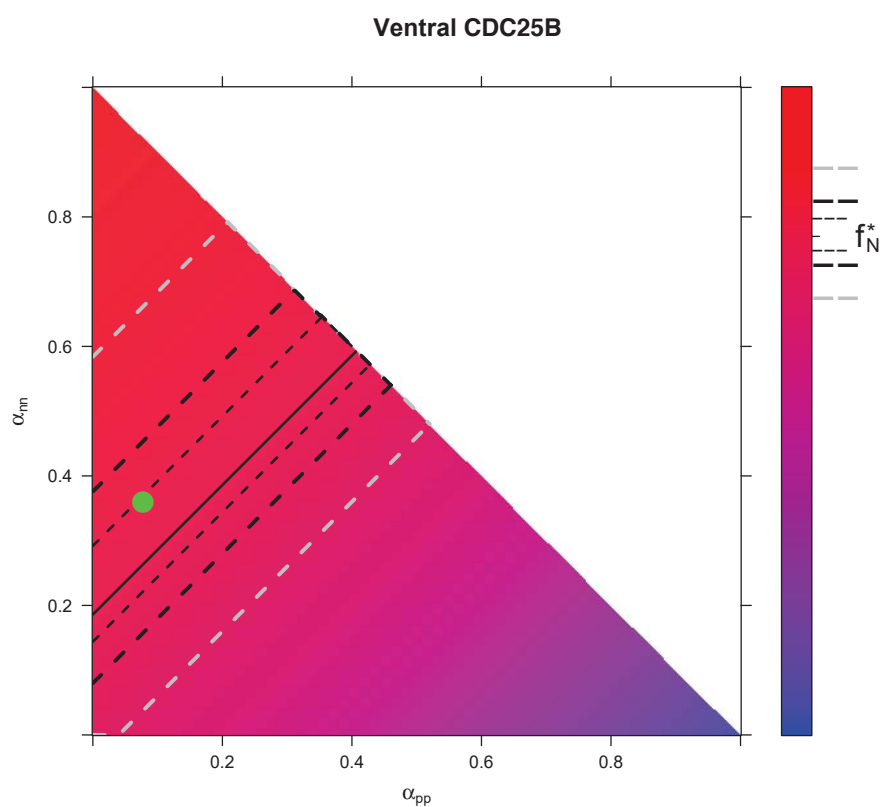

Figure 6: **Predicted  $f_N(48)$  from  $f_N(24)$  for every distribution of fates for CDC25B condition in Ventral area**

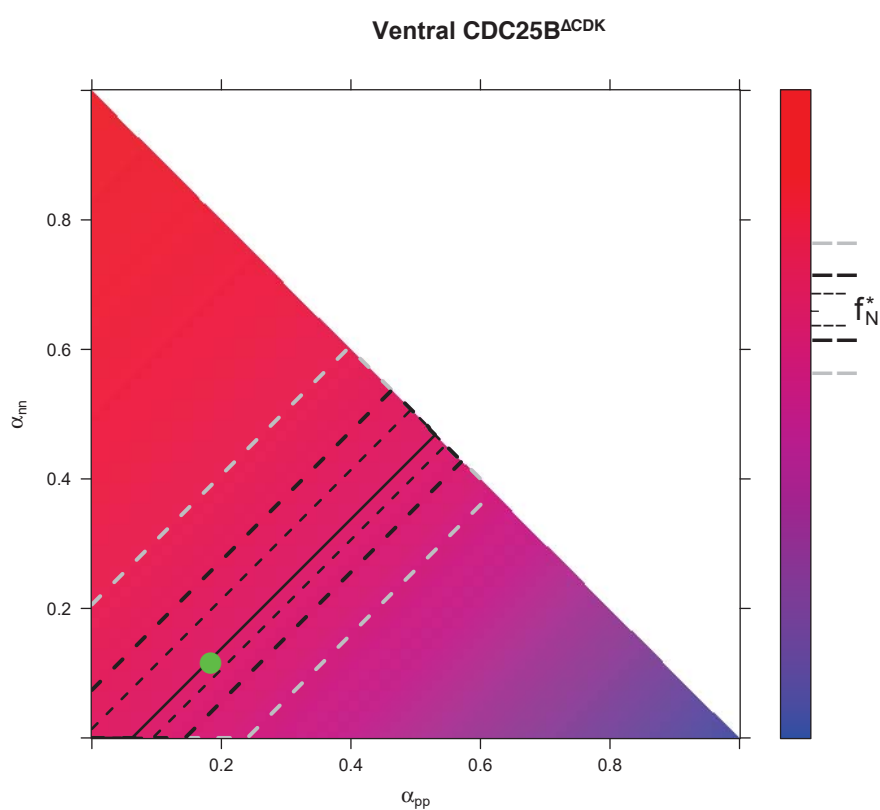

Figure 7: **Predicted  $f_N(48)$  from  $f_N(24)$  for every distribution of fates for CDC25B<sup>ΔCDK</sup> condition in Ventral area**

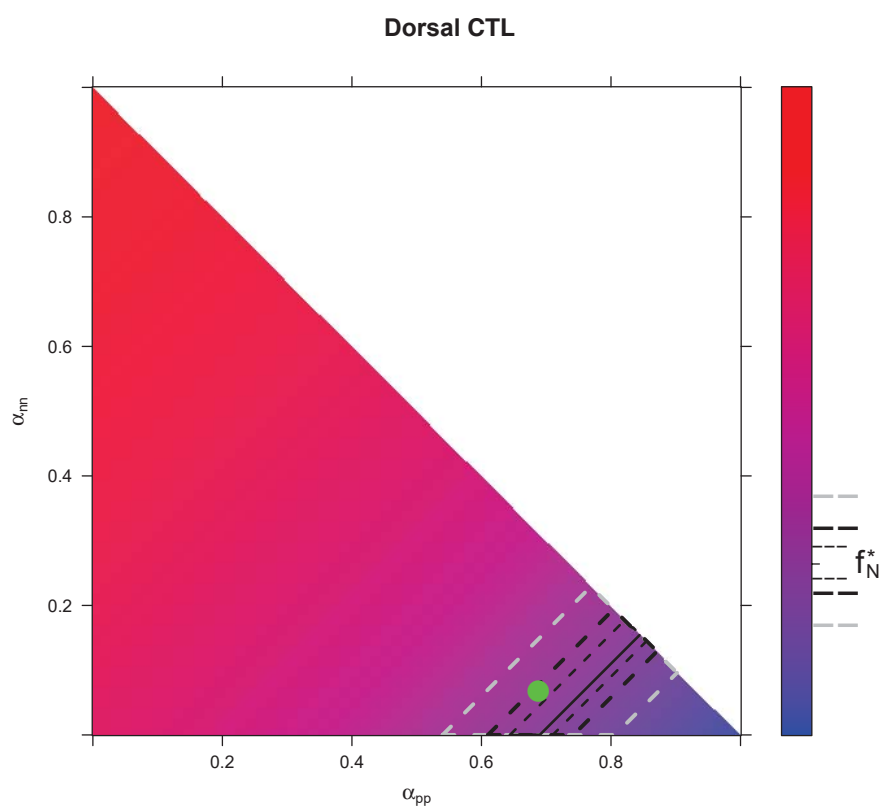

Figure 8: Predicted  $f_N(48)$  from  $f_N(24)$  for every distribution of fates for control condition in Dorsal area

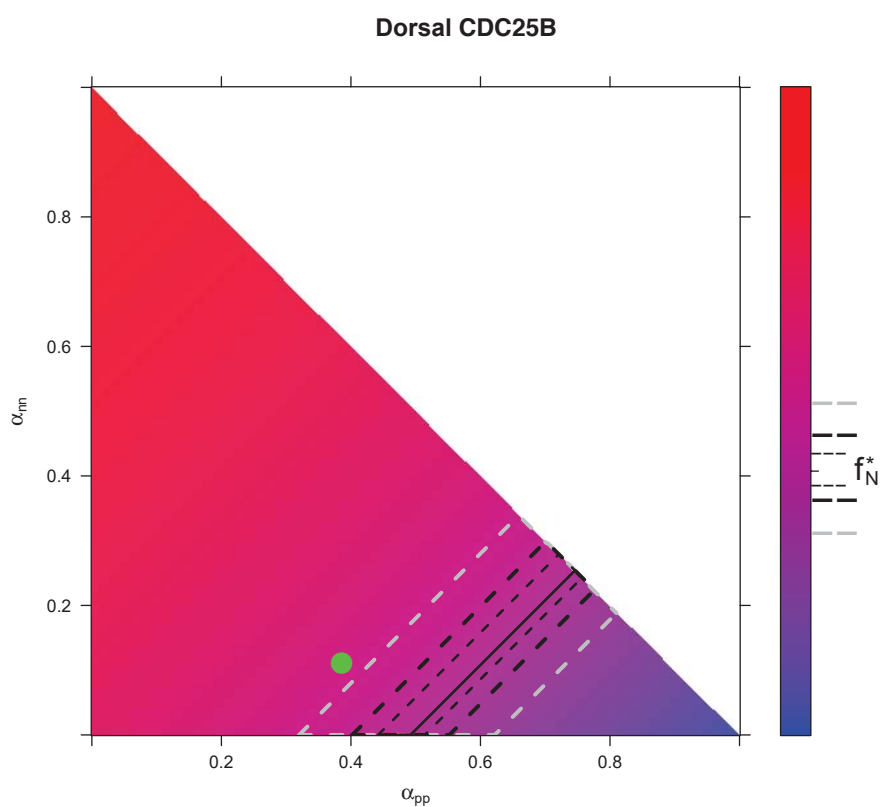

Figure 9: **Predicted  $f_N(48)$  from  $f_N(24)$  for every distribution of fates for CDC25B condition in Dorsal area**

66

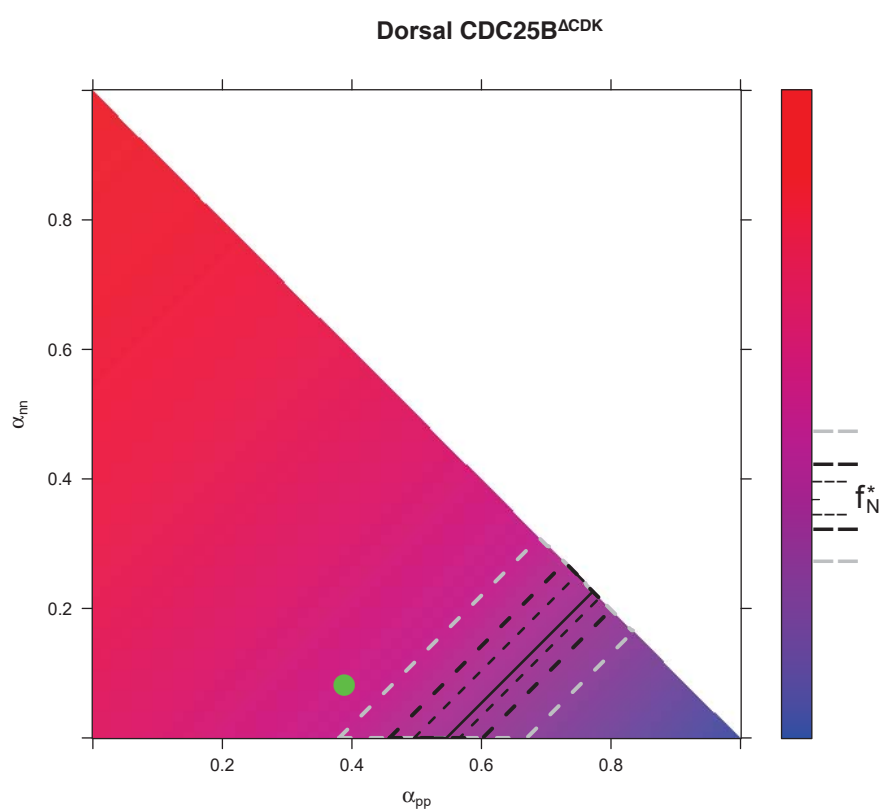

Figure 10: **Predicted  $f_N(48)$  from  $f_N(24)$  for every distribution of fates for CDC25B<sup>ΔCDK</sup> condition in Dorsal area**



## 196 4.2 Predicted fraction of neurons at 48h knowing the frac- 197 tions of neurons and the fate distribution at 24h.

198 For computation of the predicted fractions of neurons at 48h (a.e.) reported in  
199 the main text (Figs. 6C), we used Eq.28, parametrized by the data obtained  
200 for the averaged fraction of neurons at 24h (a.e.), the fate distribution at 24h  
201 (a.e.), and the cell cycle 12h.

202 All predictions are gathered in fig. 11 as a function of the change in the  
203 balance proliferation/differentiation of the progenitors, induced by the CDC25B  
204 and the CDC25B<sup>ΔCDK</sup> experiments. Together, the observations indicate that  
205 CDC25B and CDC25B<sup>ΔCDK</sup> result in an increased proportion of neurons 48h  
206 a.e. (HH22).

207 Such an increased *proportion* of neurons is actually compatible with two  
208 dynamical scenarios regarding how the absolute amounts of the two pools (pro-  
209 genitors, neurons) are modified by CDC25B gain of function: scenario 1) a  
210 speed-up of the neurons pool so that it increases faster under the gain of func-  
211 tion at the expense of the progenitors pool expansion, or scenario 2) a decrease  
212 of the progenitors pool while the pool of neurons keeps the same expansion  
213 rate. Which scenario is relevant depends on how CDC25B affects the balance  $\gamma$   
214 between proliferation and differentiation.

215 The pool of progenitors can increase only if  $\gamma > 0$ , which implies  $\alpha_{pp} > \alpha_{nn}$ .  
216 In this case, the two pools can increase (scenario 1), their respective growth  
217 rates are controlled by  $\gamma$  and the neurogenic effect of CDC25B gain of function  
218 will produce a greater absolute number of neurons in the end (at 48h / HH22).  
219 Otherwise ( $\gamma < 0$ , i.e.  $\alpha_{pp} < \alpha_{nn}$ ), the pool of neurons can increase at about  
220 the same rate, yielding the same absolute number of neurons at 48h/HH22, and  
221 the increased fraction of neurons reflects a depletion of the pool of progenitors  
222 (scenario 2).

223 The model enlightens which is the most probable scenario for the dynamical  
224 impact of CDC25B manipulation since we can compute the underlying evolution  
225 of the absolute amounts of the two pools that determines the evolution of the  
226 neuronal fraction (Fig. 12C).

227 Under CDC25B gain of function in the dorsal neural tube (Fig. 12C-right),  
228 the percentage of progenitors performing pp-divisions keeps greater than the  
229 percentage of those performing nn-divisions ( $38.6\% > 11.3\%$ ,  $\alpha_{pp} > \alpha_{nn}$ ) and  
230 the balance is still positive ( $\gamma = 0.386 - 0.113 = 0.273 > 0$ ), so the pool of  
231 progenitors still increases but at a lower rate than control (where  $\gamma = 0.663 -$   
232  $0.078 = 0.585$ ). The higher percentage of neurons at 48h/HH22 then results  
233 from an even higher absolute number of neurons (scenario 1).

234 By contrast, in the ventral neural tube, the balance shifts from  $\gamma = 0.393 -$   
235  $0.127 = 0.266$  in control to  $\gamma = 0.069 - 0.407 = -0.338$ , becoming negative  
236 under CDC25B gain of function (scenario 2). Accordingly, the absolute number  
237 of neurons at 48h/HH22 is poorly affected, but the pool of progenitors declines,  
238 explaining the higher fraction of neurons (Fig. 12C-left).

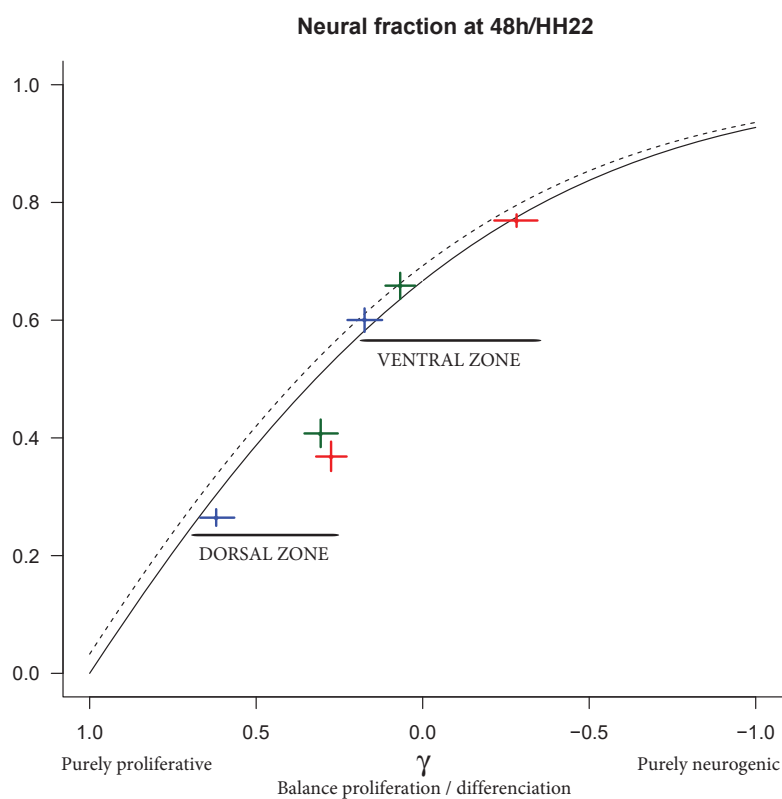

Figure 11: **Predicted  $f_N(48)$  from  $f_N(24)$  varying the balance proliferation/differentiation  $\gamma$ .** Plain line reports the model prediction for the dorsal zone, dotted line the model prediction for the ventral zone (predictions differ due to differences in the initial fraction  $f_N(24)$  in the two zones). The experimental data are reported by crosses (cross arm length are 95% CI). Blue cross: CTL, red cross: CDC25B, green cross: CDC25B $\Delta$ CDK.

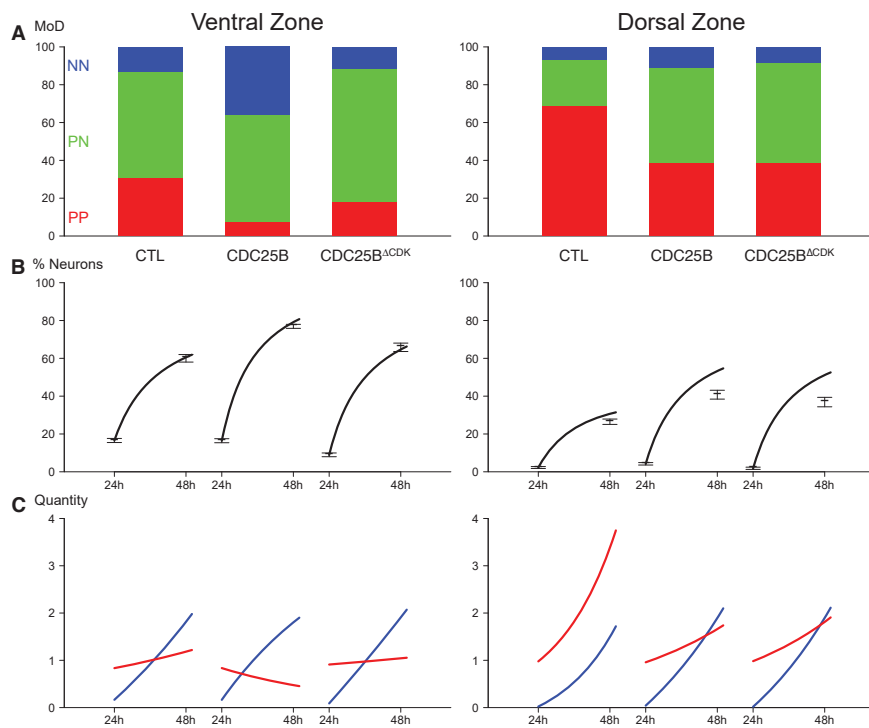

Figure 12: **Summary of the data and predictions.** A — Observed distributions of modes of divisions (MoD) for the three conditions and the two zone. B — Predicted evolutions of the neuronal fraction from  $f_N(24)$  to  $f_N(48)$  given the observed distribution of fates (lines) and observed fractions at 24h and 48h. C — Corresponding evolution in numbers of the two pools (Red: progenitors, Blue: neurons).
